# Supplementary material
Source: PubMed Central journal article supplement (PMC9272812)
Supplement: NIHMS1678377-supplement-1.pdf [file NIHMS1678377-supplement-1.pdf]

**Table E1. Demographics of enrolled AD patients and healthy controls**

|                           | <b>AD</b>         | <b>HC</b>    |
|---------------------------|-------------------|--------------|
| <b>Total (n)</b>          | 53                | 20           |
| <b>Male</b>               | 27                | 11           |
| <b>Female</b>             | 23                | 9            |
| <b>Age</b>                | 29.56 ± 7.88      | 27.20 ± 4.76 |
| <b>EASI score</b>         | 21.51 ± 3.2       | N/A          |
| <b>Total IgE</b>          | 2132.63 ± 1868.41 | N/A          |
| <b>Eosinophils (%)</b>    | 7.16 ± 5.0        | N/A          |
| <b>Skin biopsies site</b> | Back              | Back         |

**Abbreviations:** AD, atopic dermatitis; HC, healthy controls; EASI, the eczema area and severity index.
