# Supplementary material
Source: PubMed Central journal article supplement (PMC9272812)

# Supplementary Figure 1

## A

Blood NKT cells (purity > 90%)

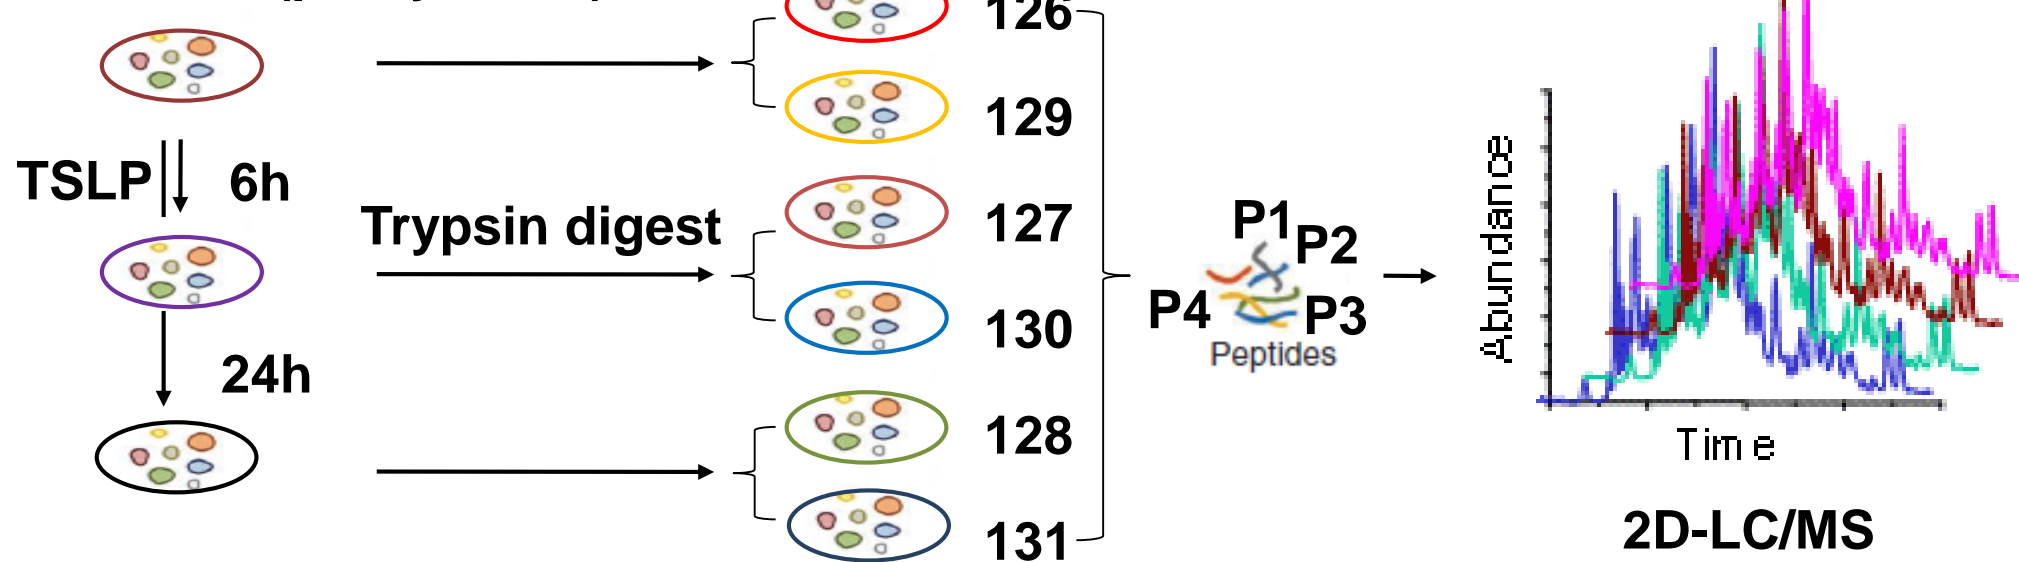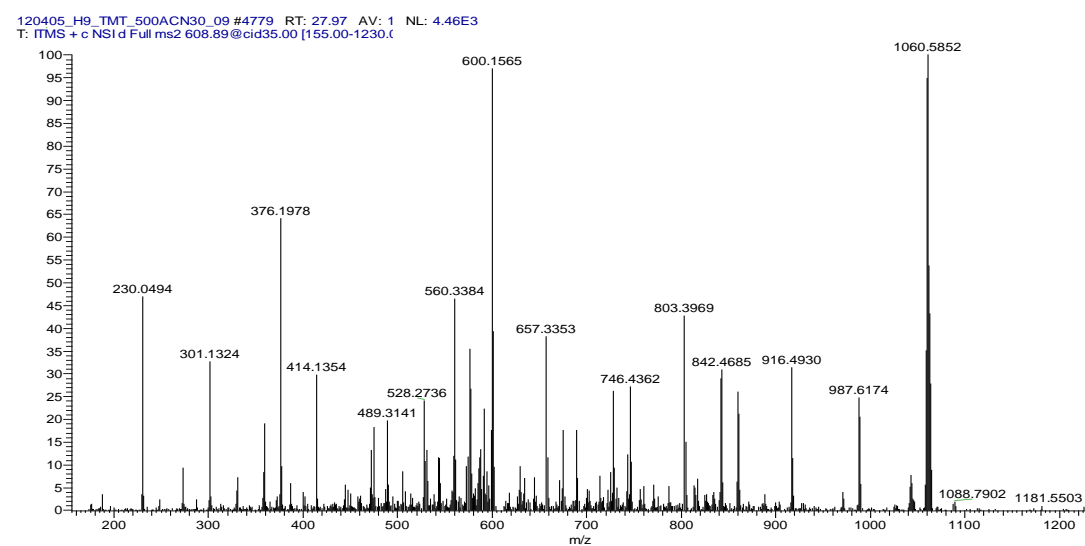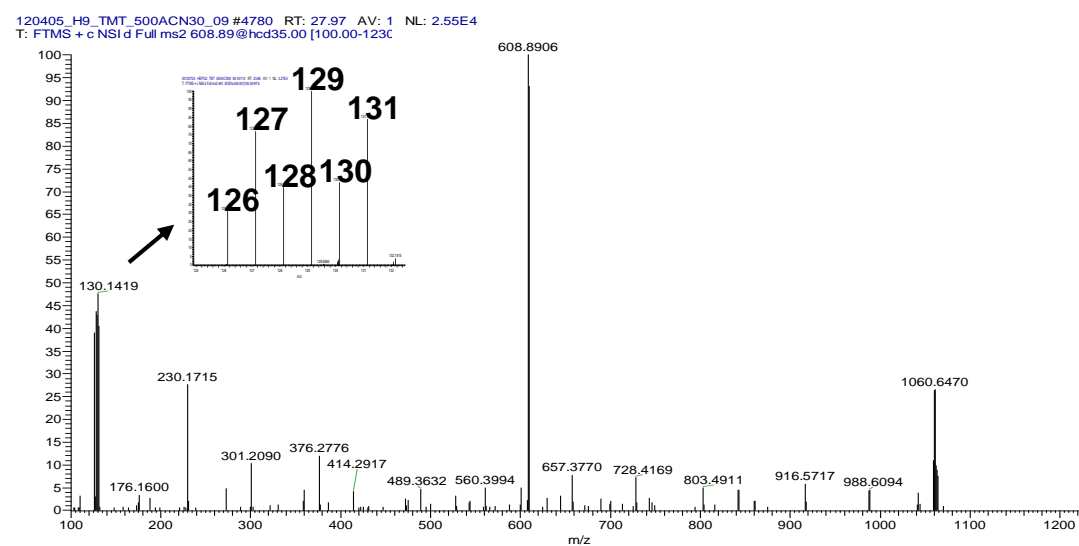

## B

CID-MS/MS for peptide identification

Bar chart of biological process categories

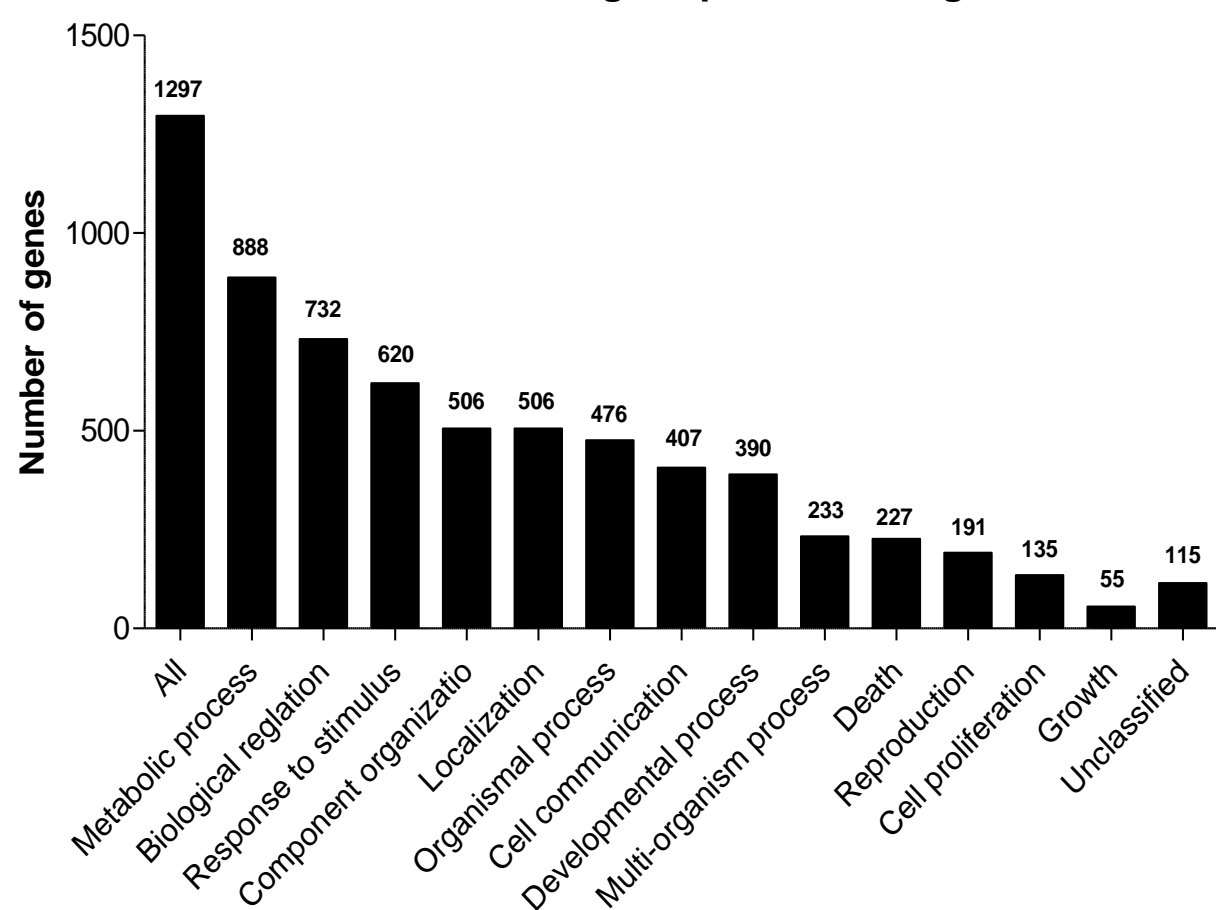

HCD-MS/MS for quantification

Bar chart of biological process categories

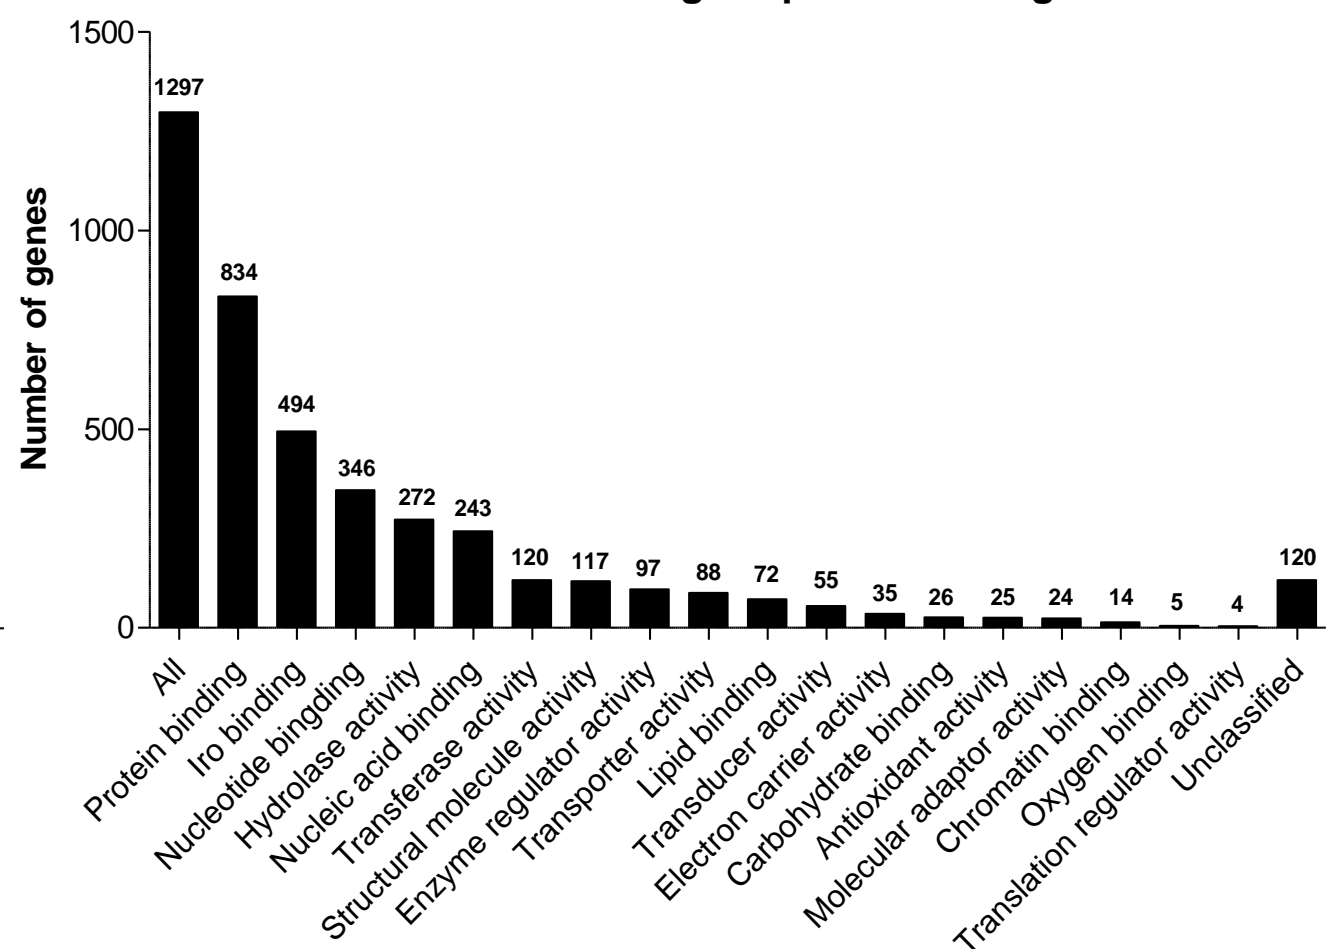

## C

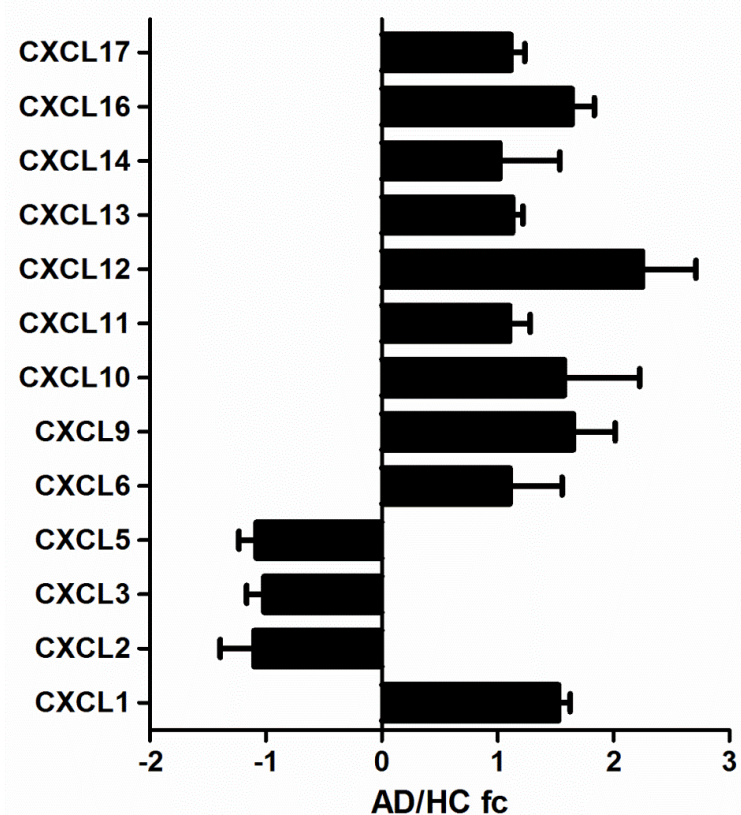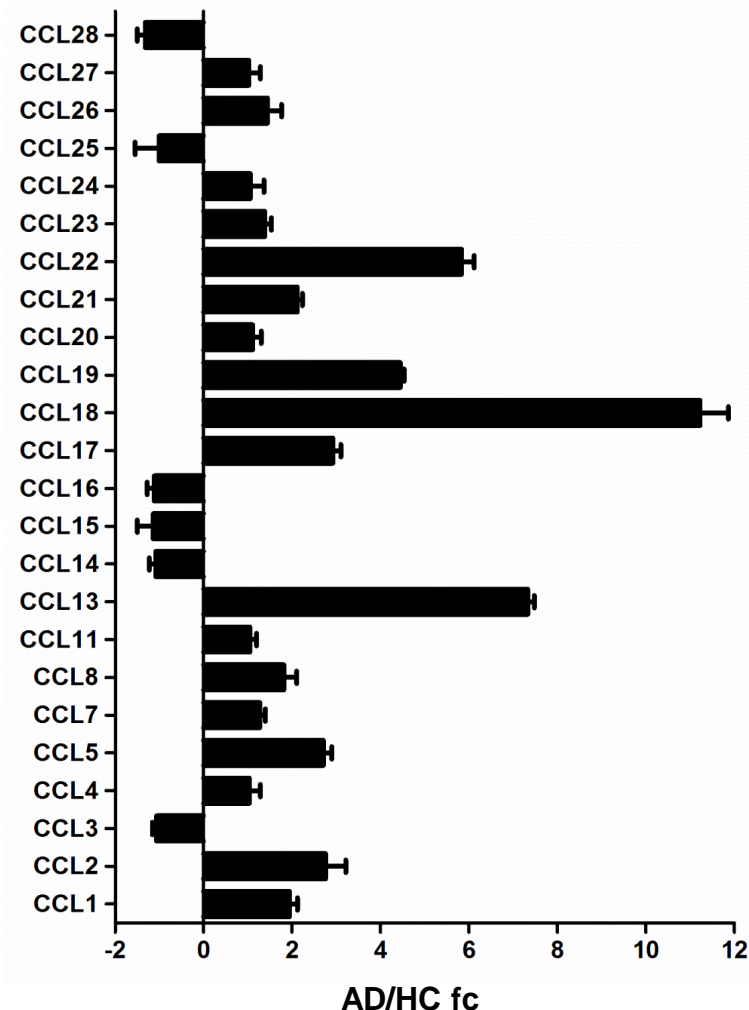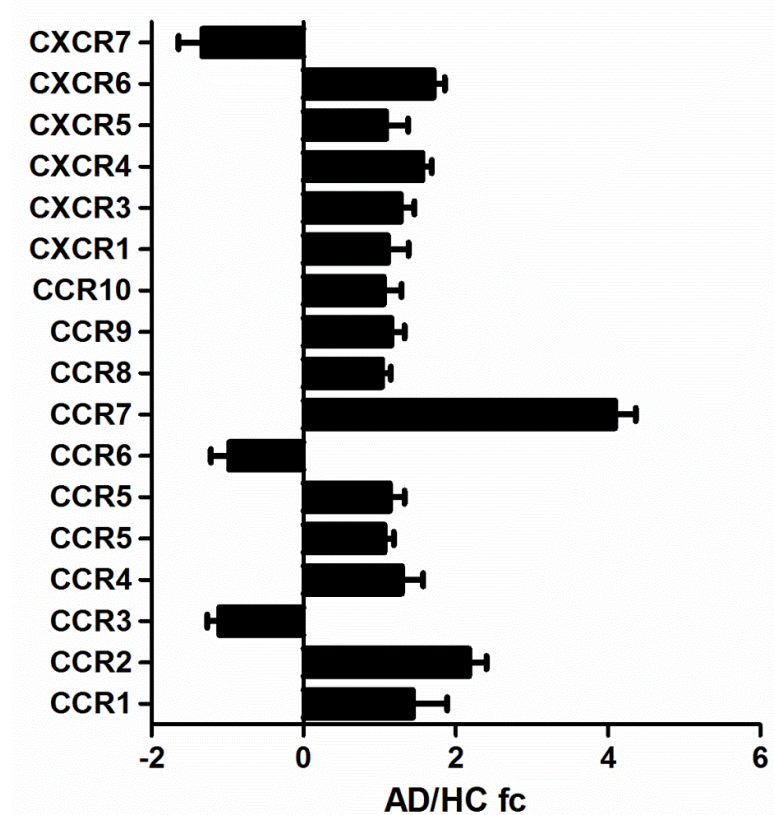

Supplement: NIHMS1678377-supplement-11.pdf [file NIHMS1678377-supplement-11.pdf]
