# Supplementary material
Source: PubMed Central journal article supplement (PMC9272812)
Supplement: NIHMS1678377-supplement-14.pdf [file NIHMS1678377-supplement-14.pdf]

# Supplementary Figure 4

**A**

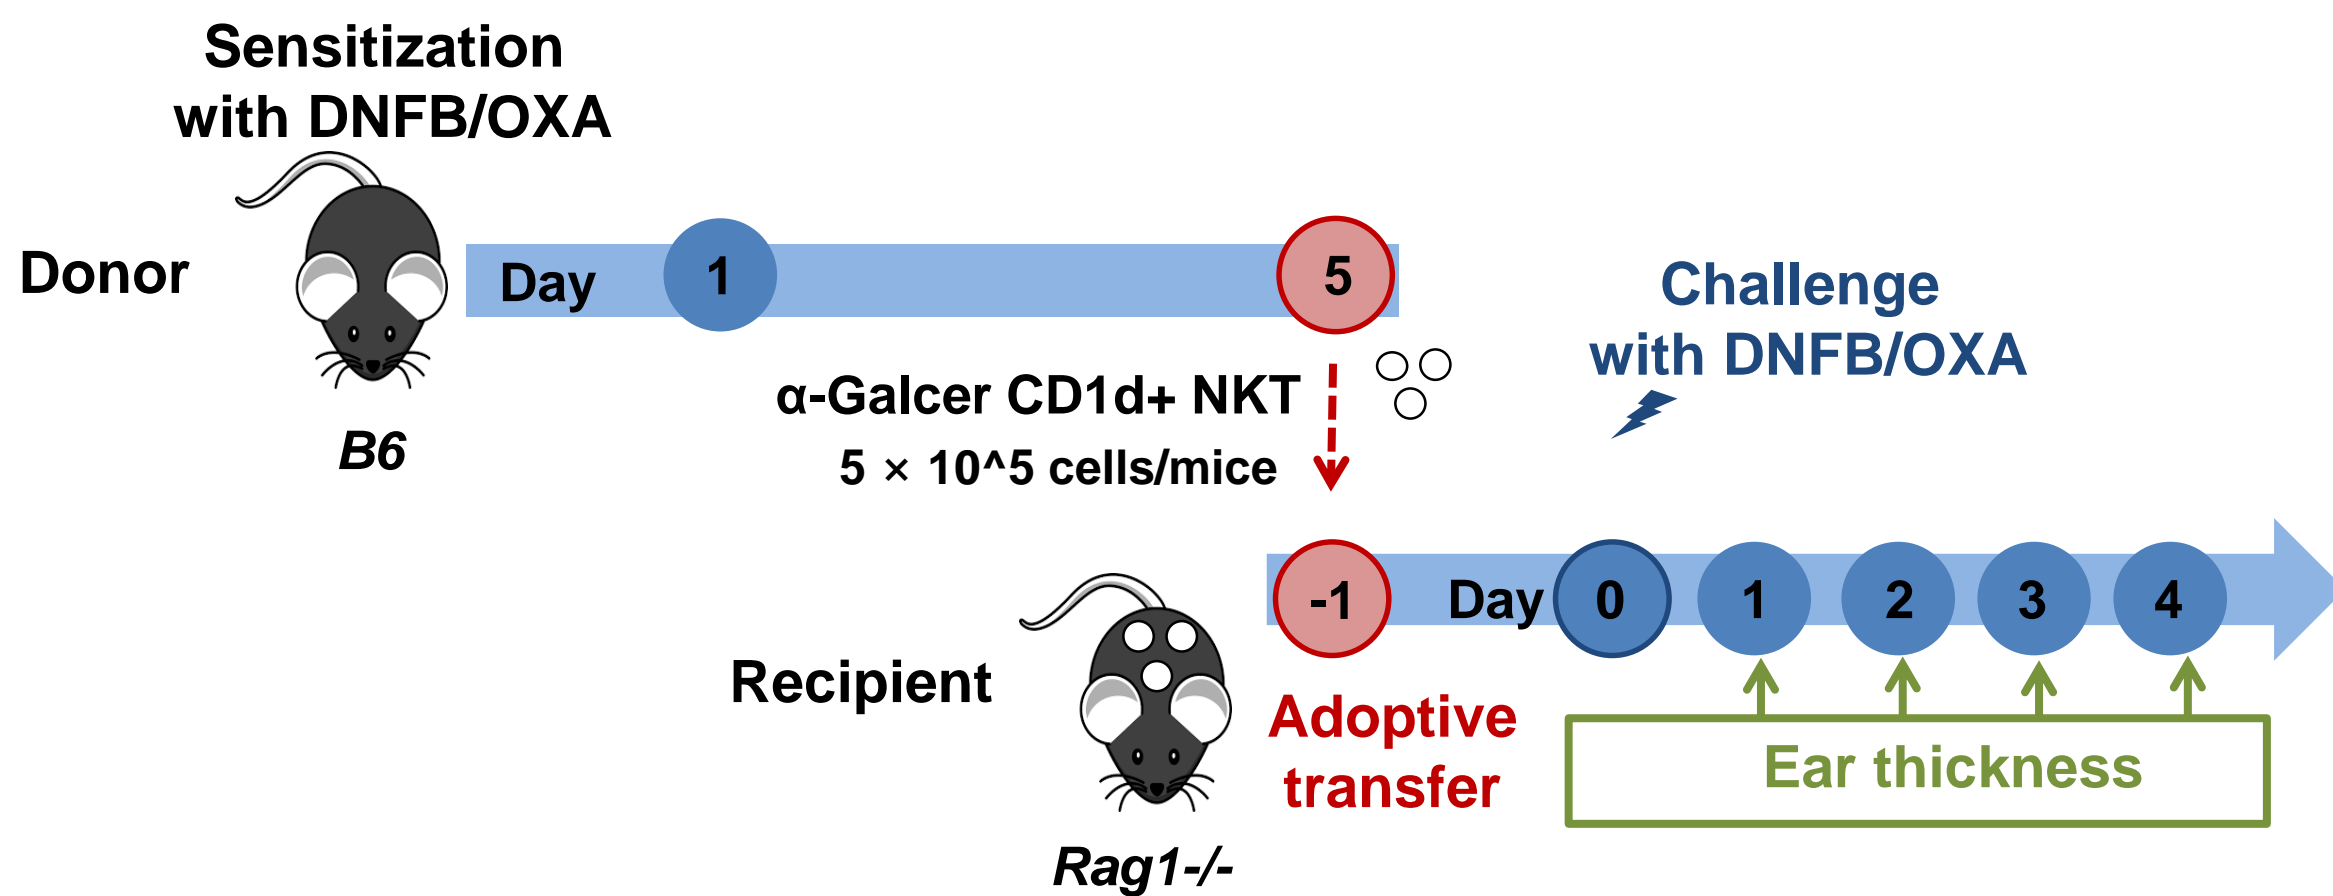

**B**

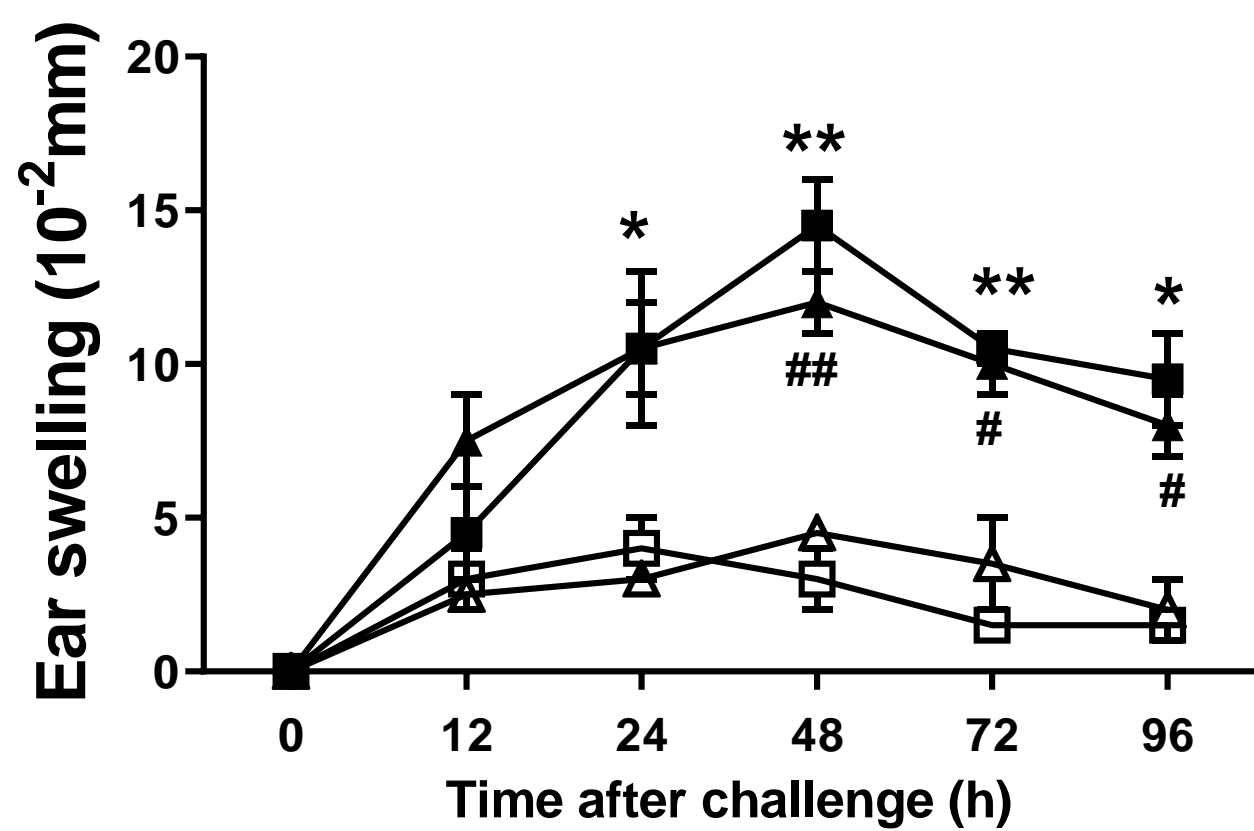

|   | Sensitization          | Challenge |
|---|------------------------|-----------|
| ▲ | DNFB-sensitized NKT-AT | DNFB      |
| △ | DNFB-sensitized NKT-AT | OXA       |
| ■ | OXA-sensitized NKT-AT  | OXA       |
| □ | OXA-sensitized NKT-AT  | DNFB      |
