# Supplementary material
Source: PubMed Central journal article supplement (PMC9272812)

# Supplementary Figure 6

**A**

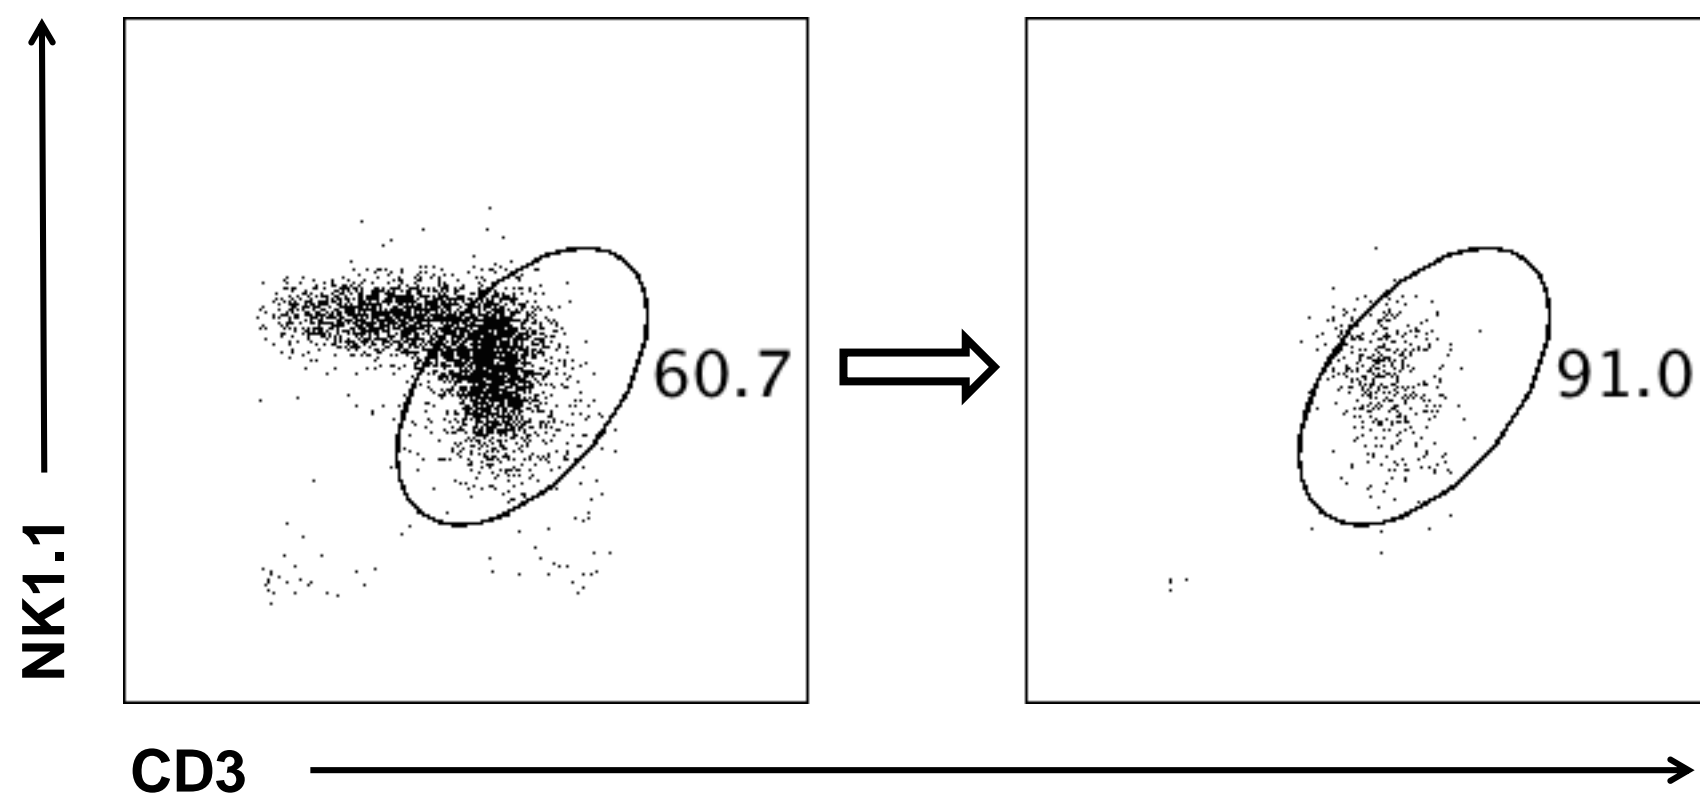

**B**

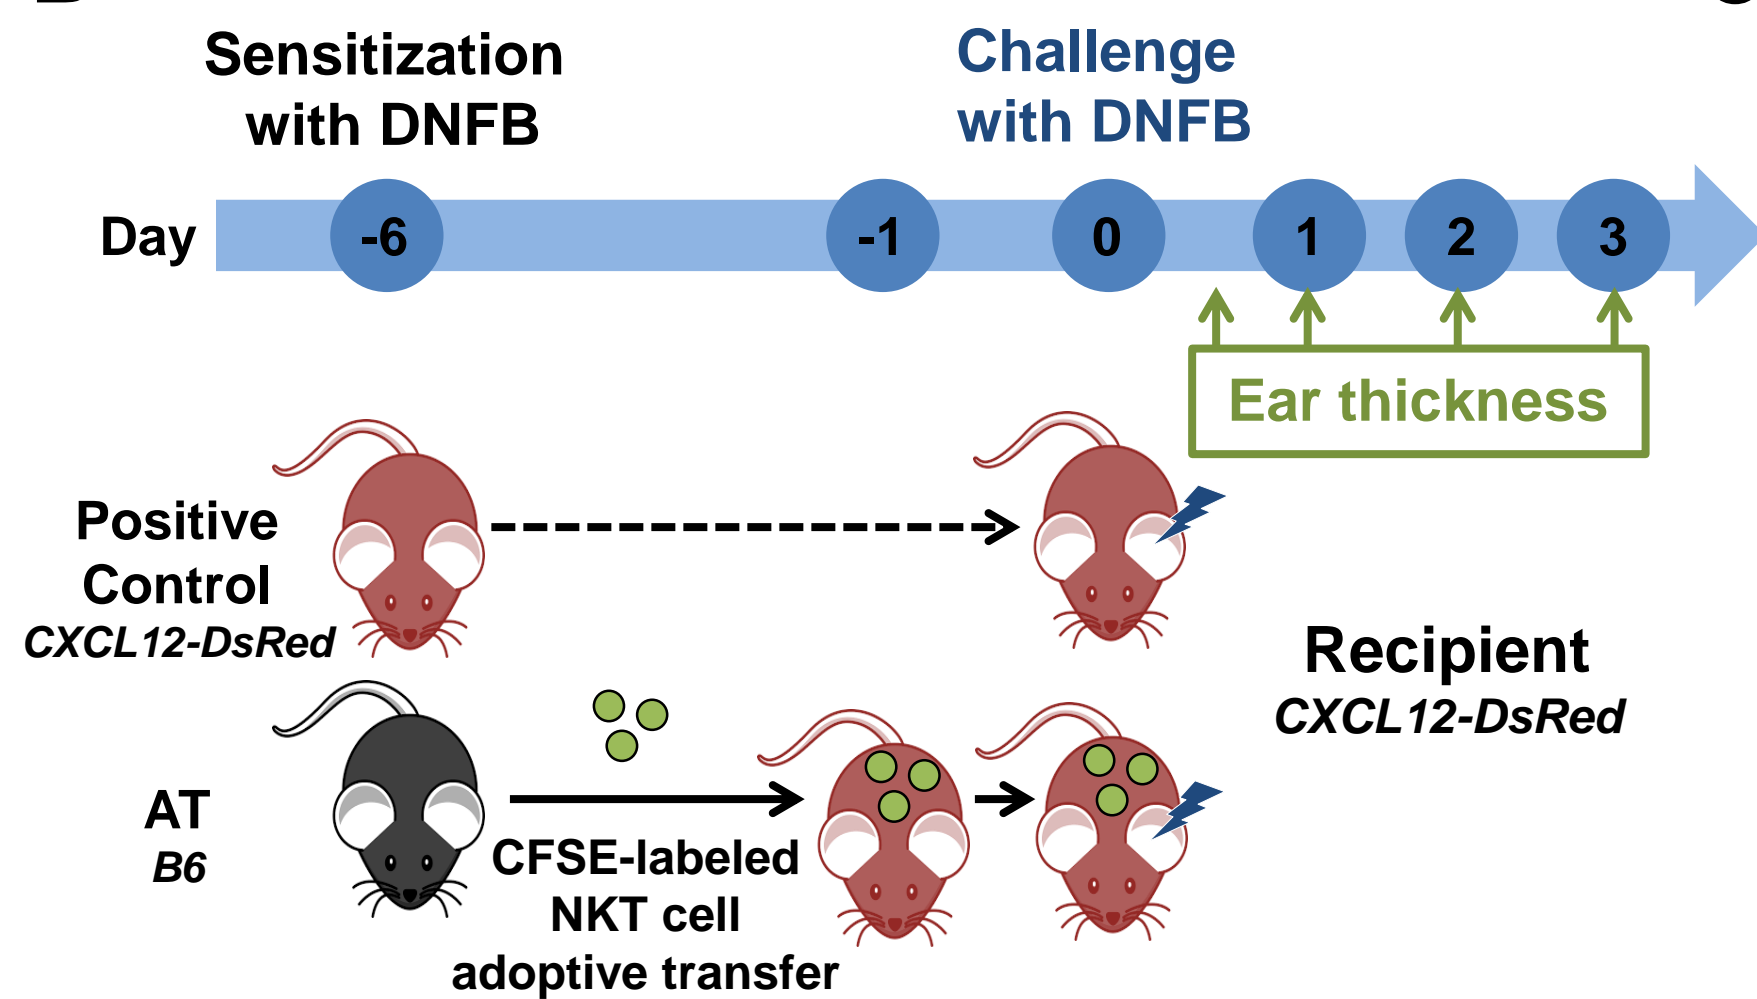

**C**

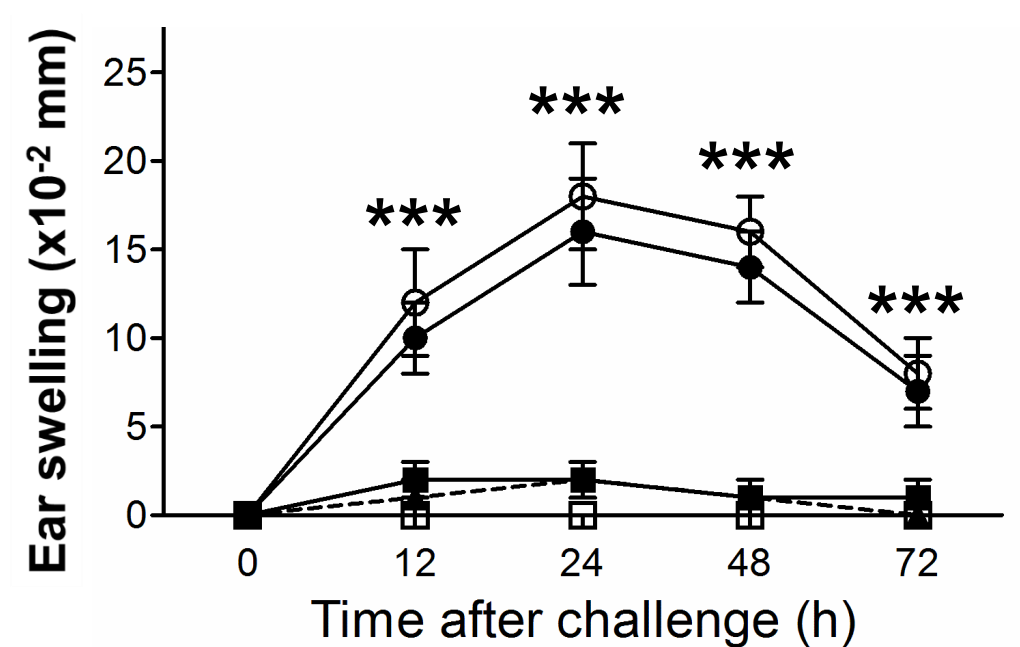

|   | Sensitization          | Challenge |
|---|------------------------|-----------|
| ▲ | -                      | DNFB      |
| □ | DNFB                   | -         |
| ○ | DNFB                   | DNFB      |
| ■ | DNFB-sensitized NKT-AT | -         |
| ● | DNFB-sensitized NKT-AT | DNFB      |

**D**

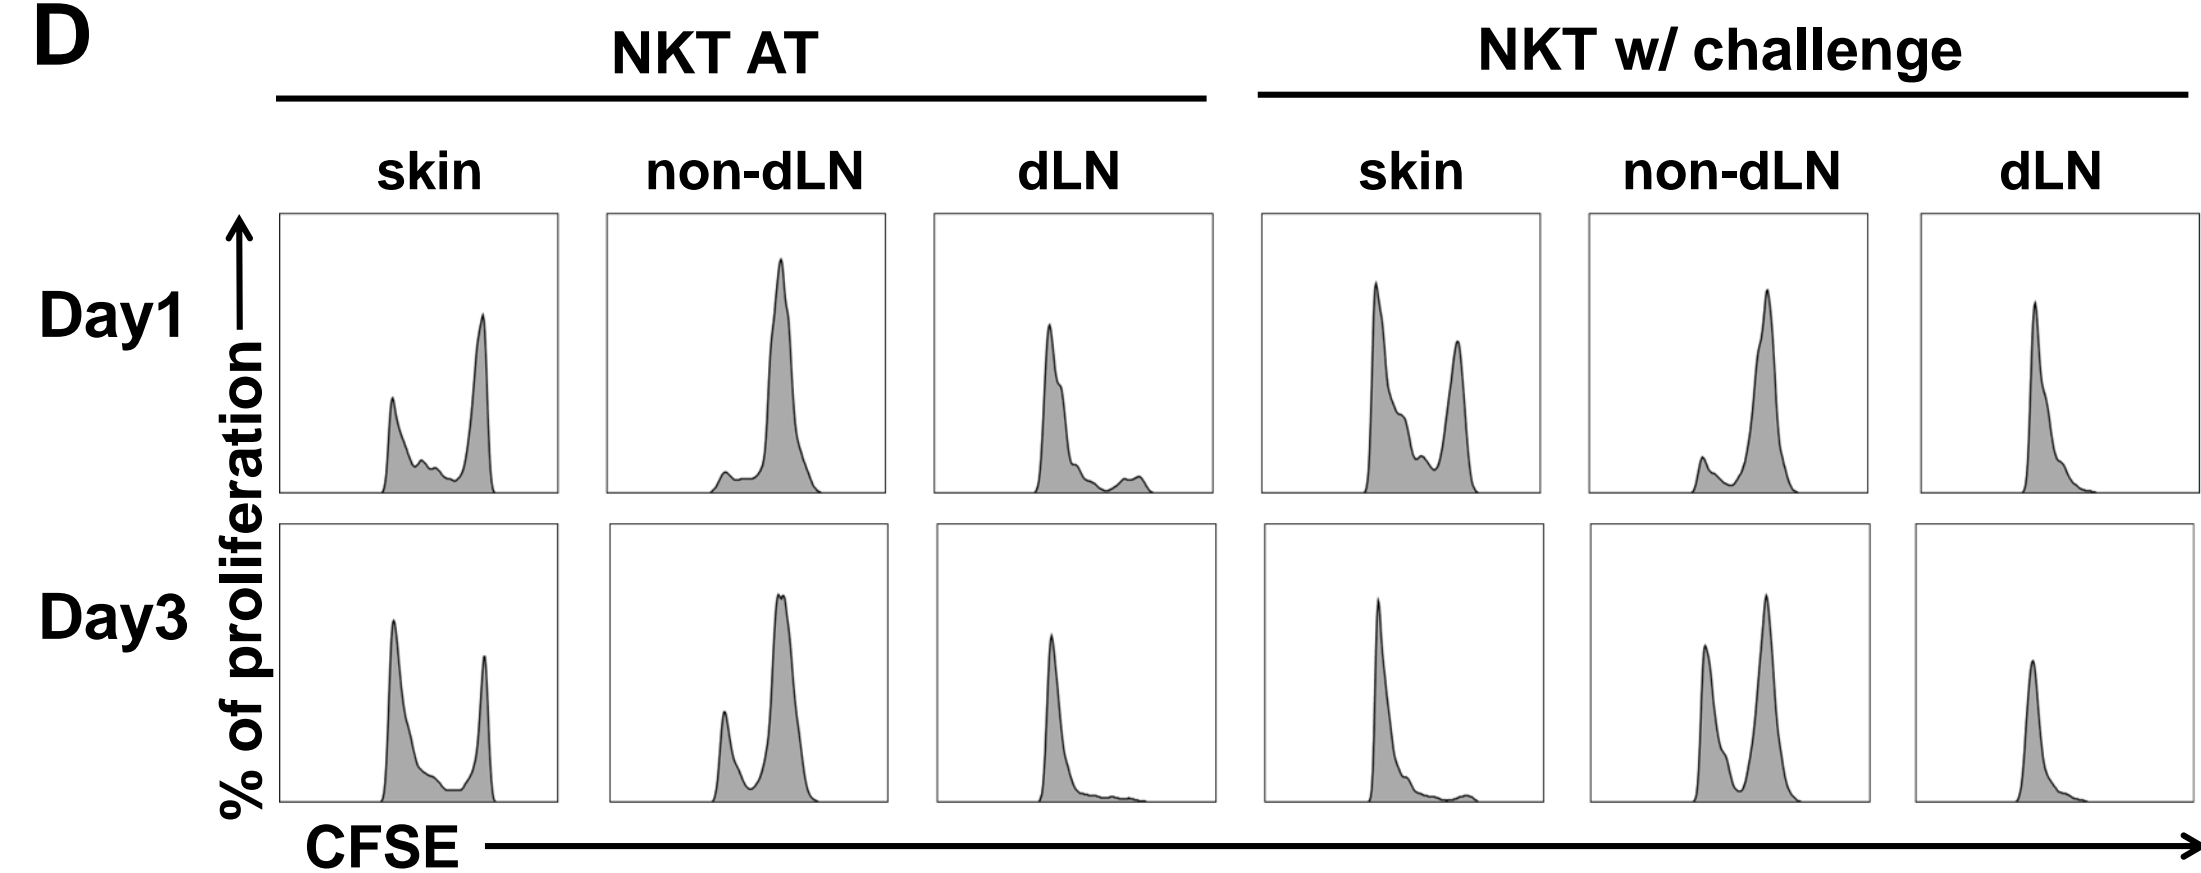

**E**

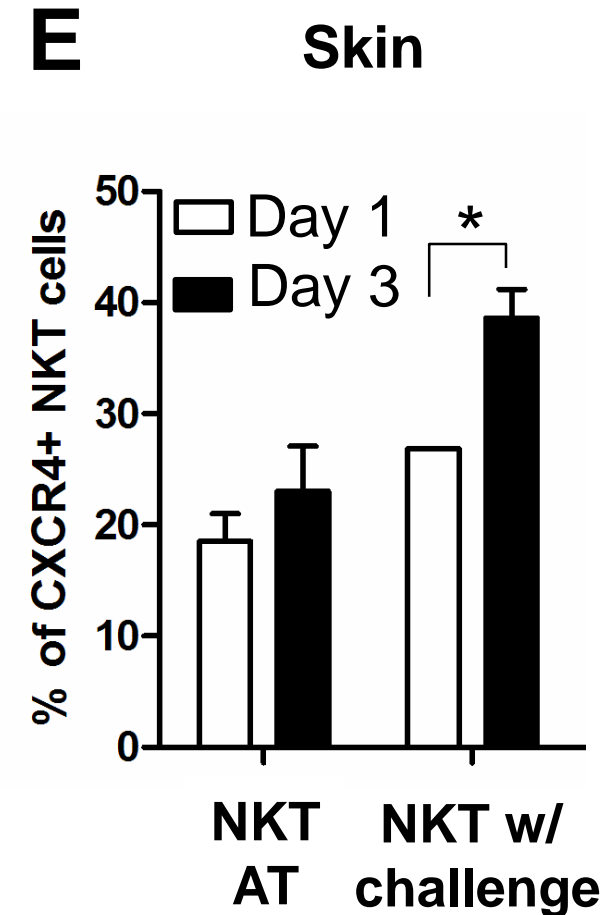

Supplement: NIHMS1678377-supplement-16.pdf [file NIHMS1678377-supplement-16.pdf]
