# Supplementary material
Source: PubMed Central journal article supplement (PMC9272812)
Supplement: NIHMS1678377-supplement-18.pdf [file NIHMS1678377-supplement-18.pdf]

# Supplementary Figure 8

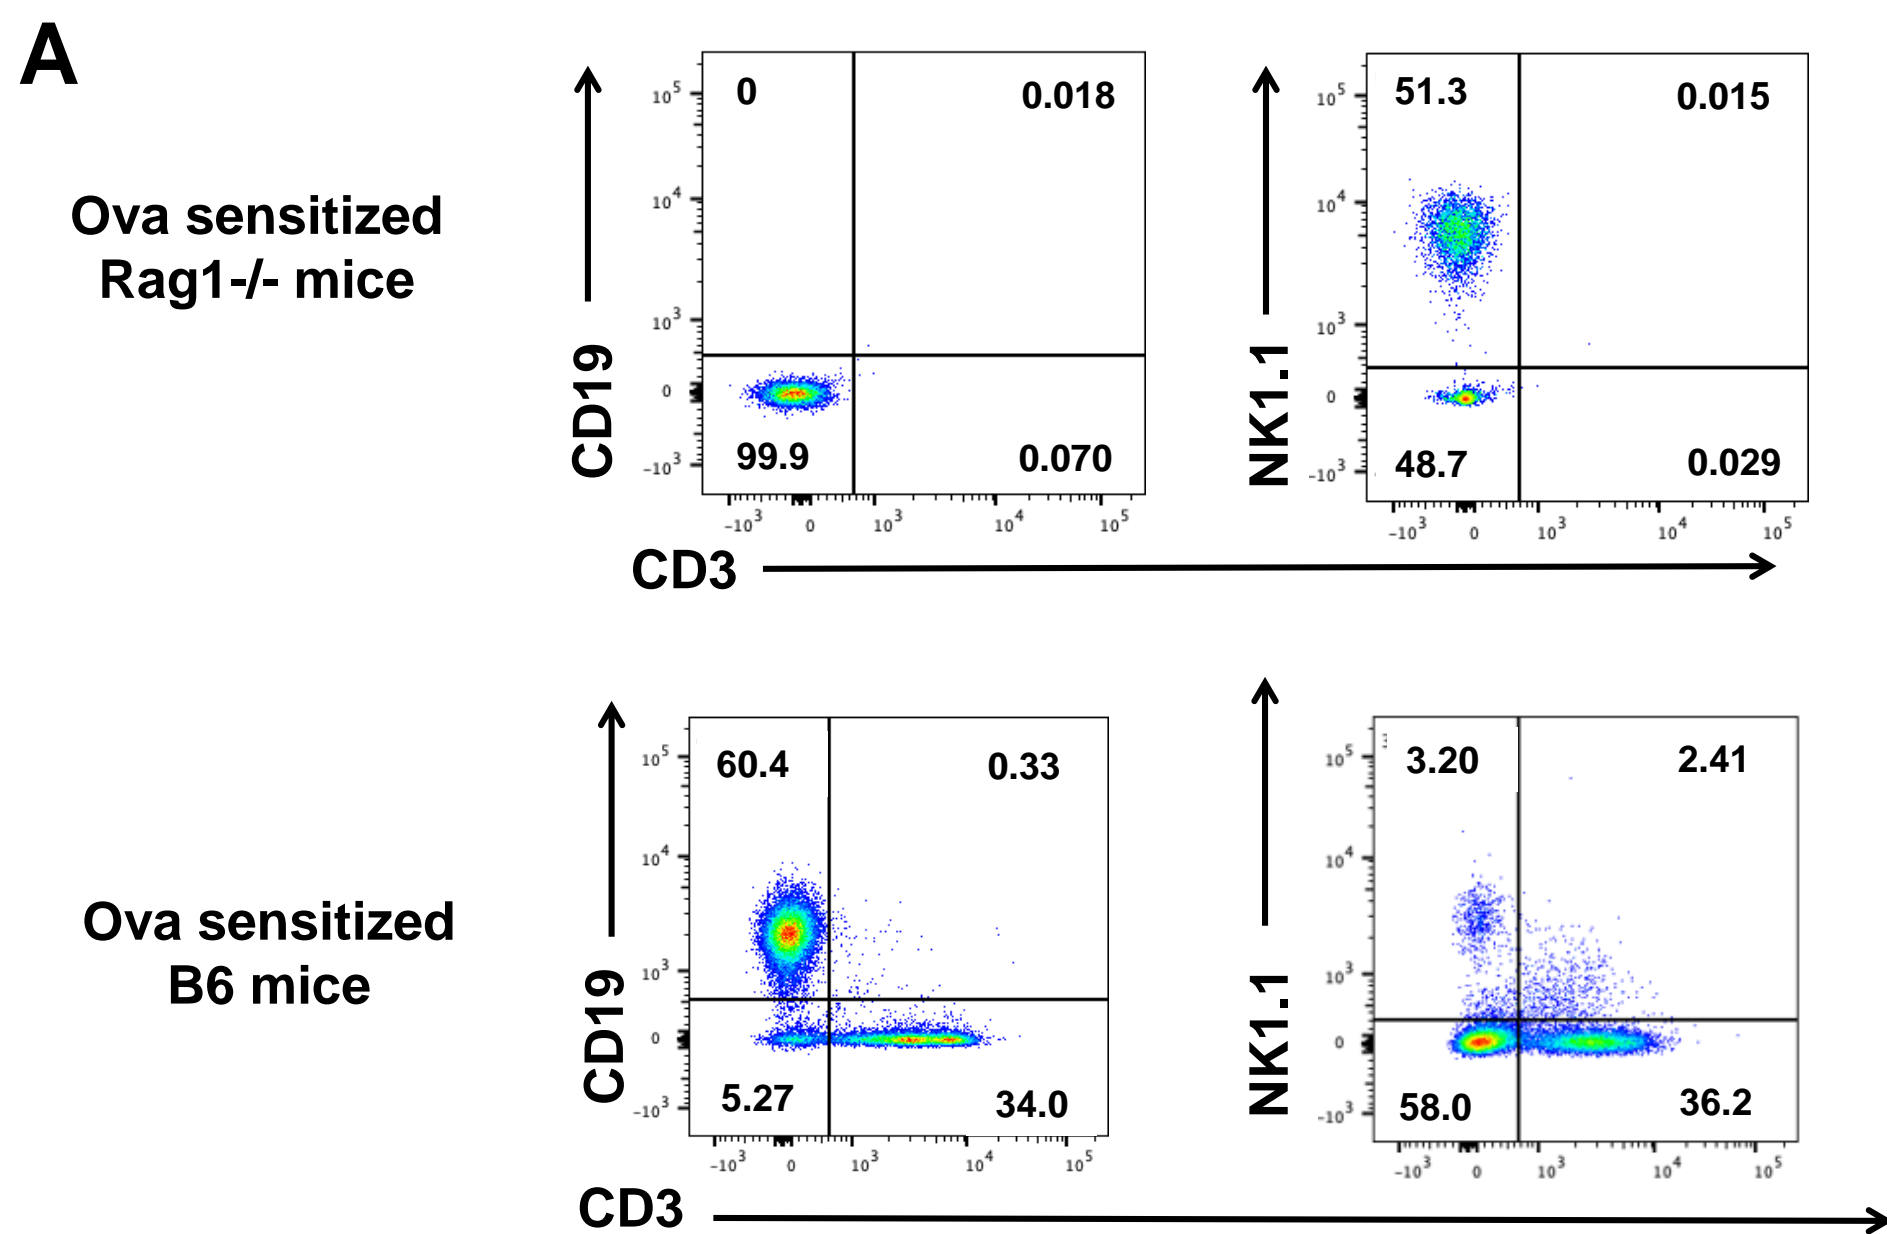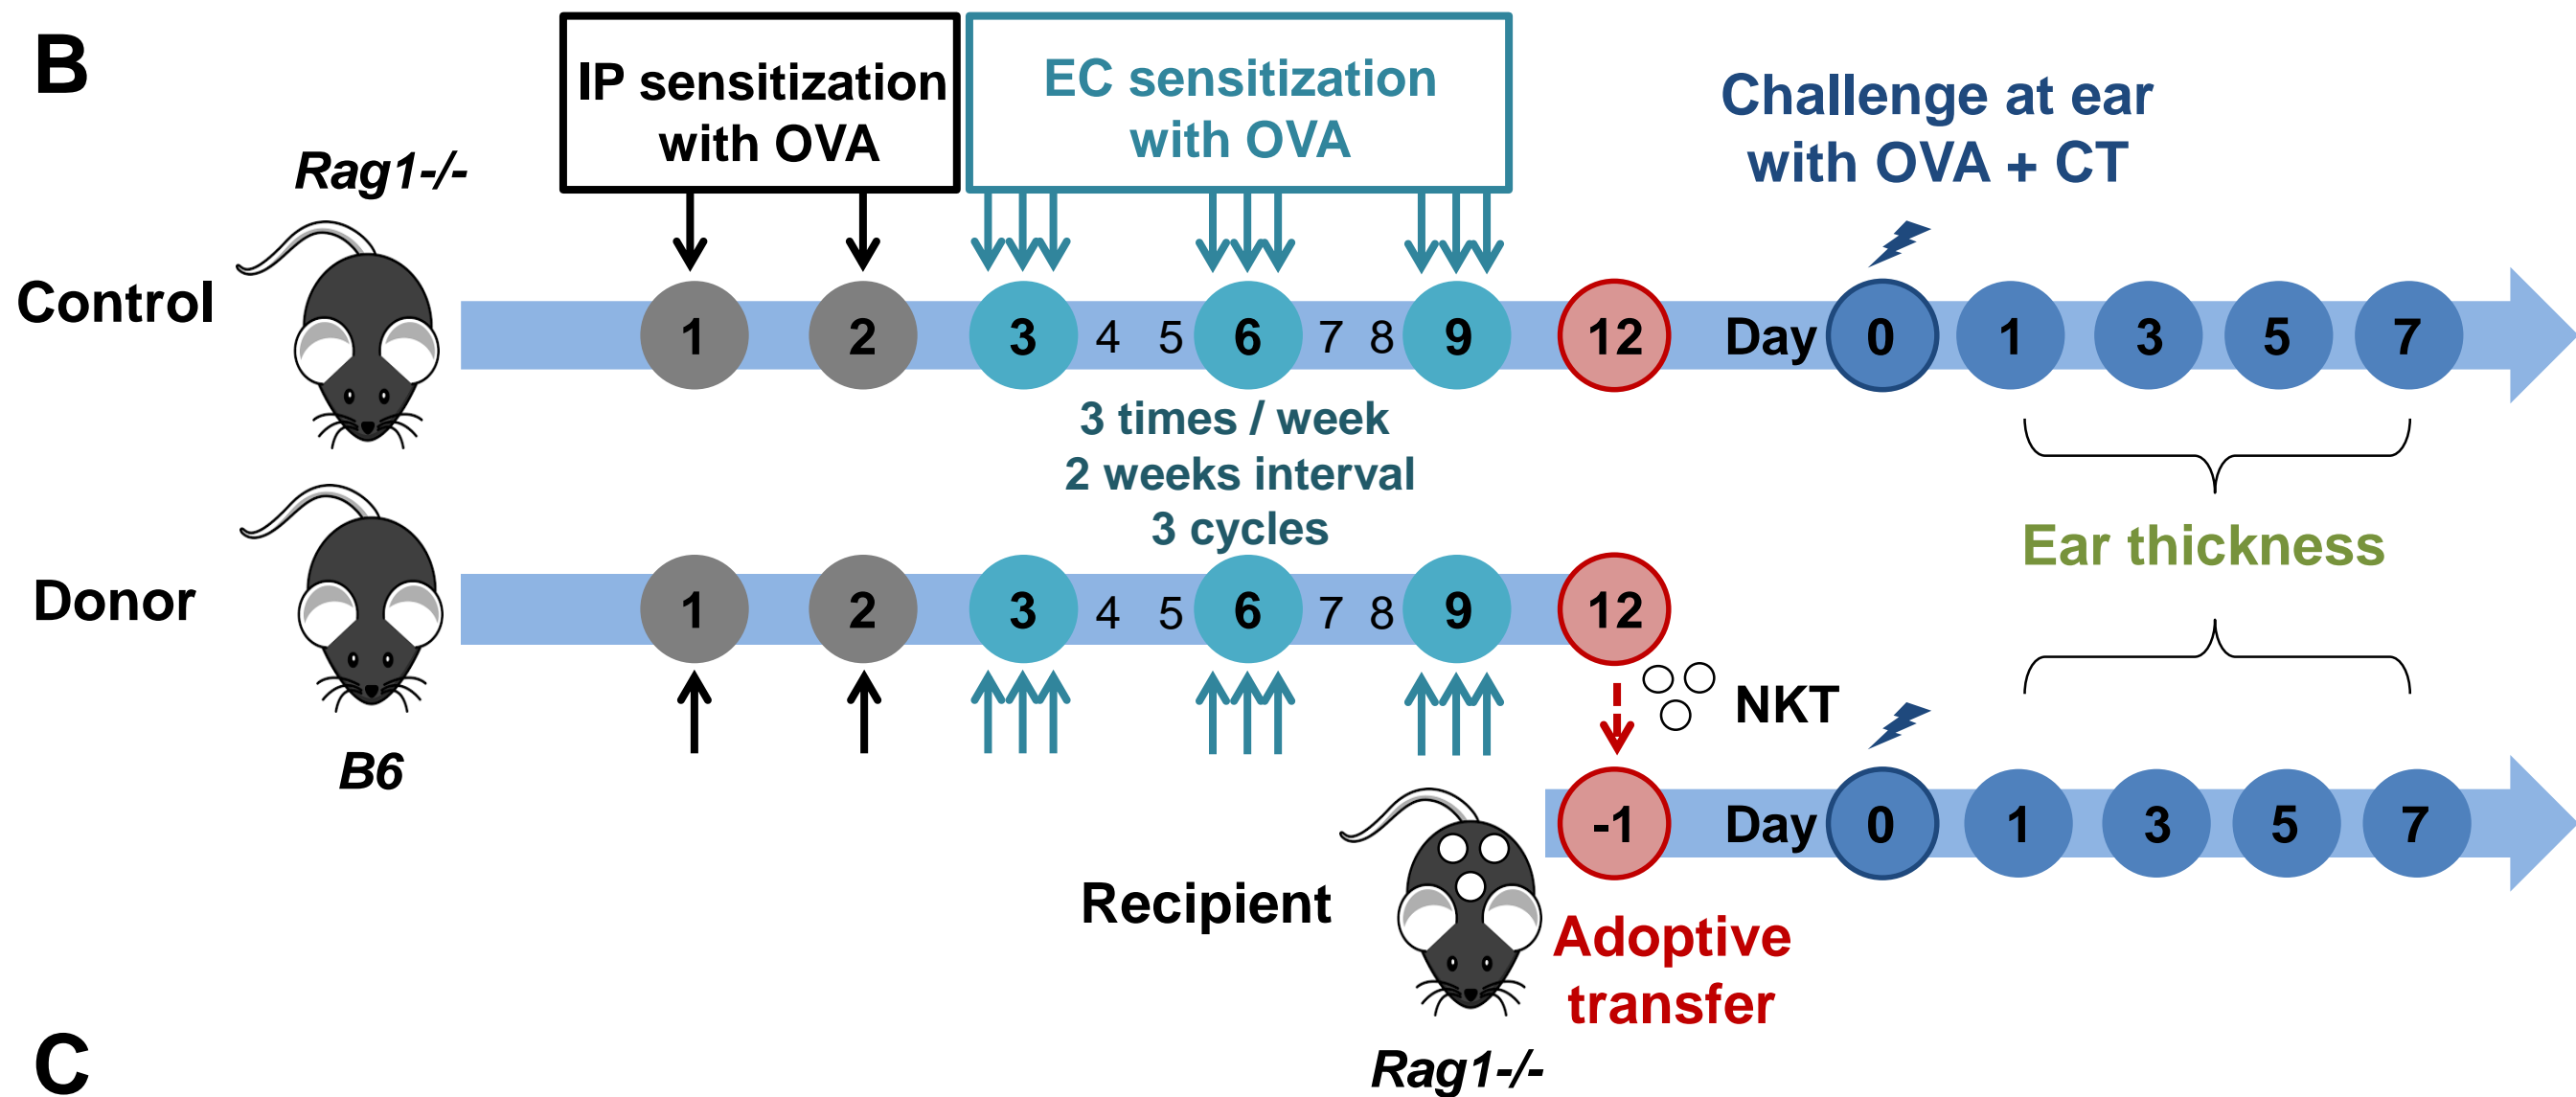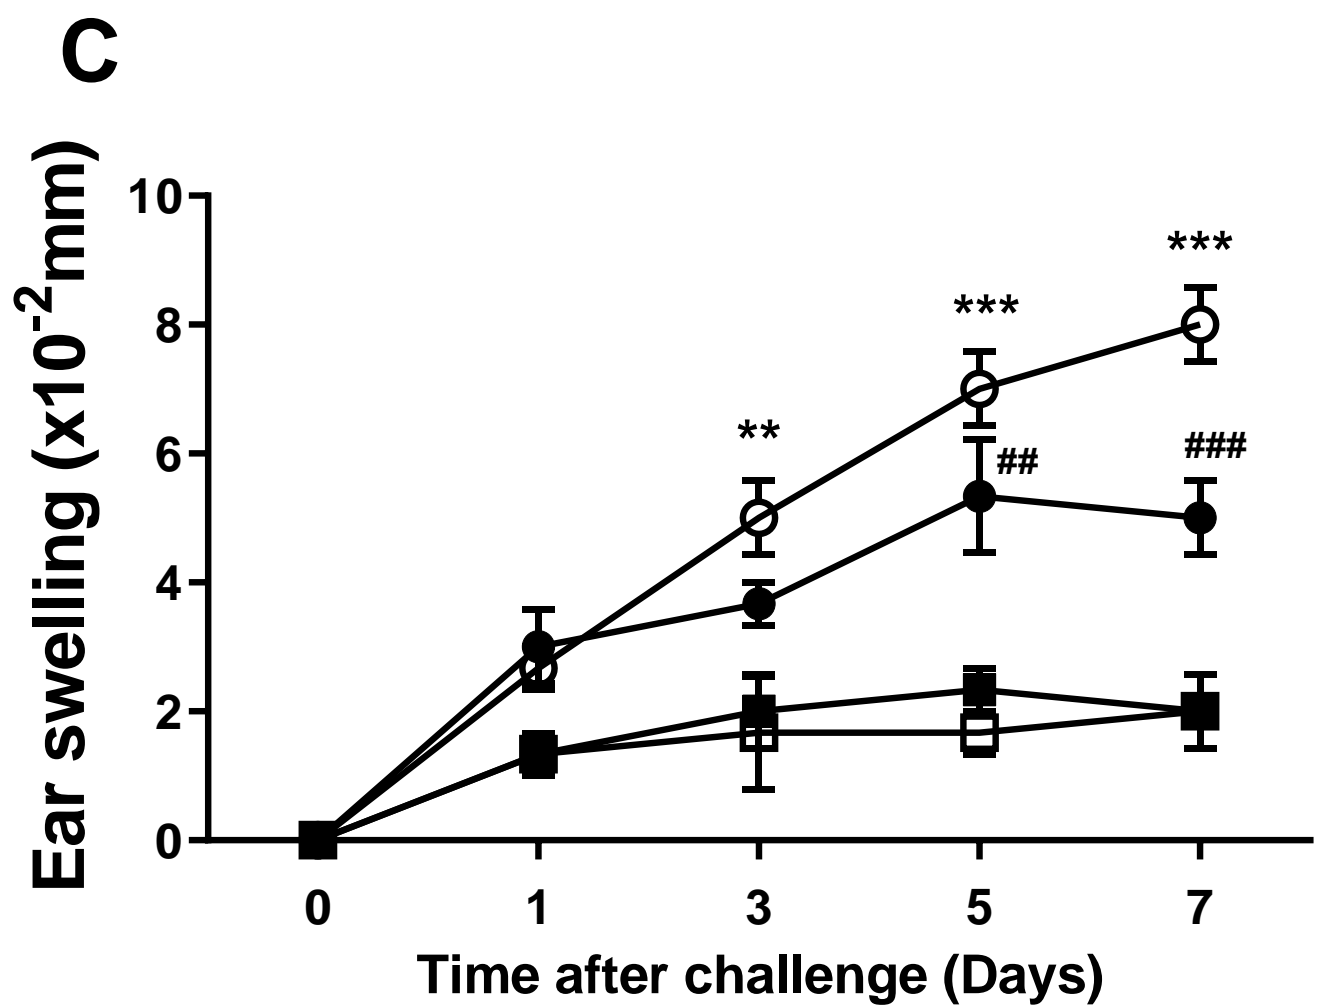

|   | Sensitization      | Challenge |
|---|--------------------|-----------|
| ● | OVA                | CT+OVA    |
| ■ | OVA                | CT only   |
| ○ | OVA-sensitized NKT | CT+OVA    |
| □ | OVA-sensitized NKT | CT only   |
