# Supplementary material
Source: PubMed Central journal article supplement (PMC9272812)

# Supplementary Figure 2

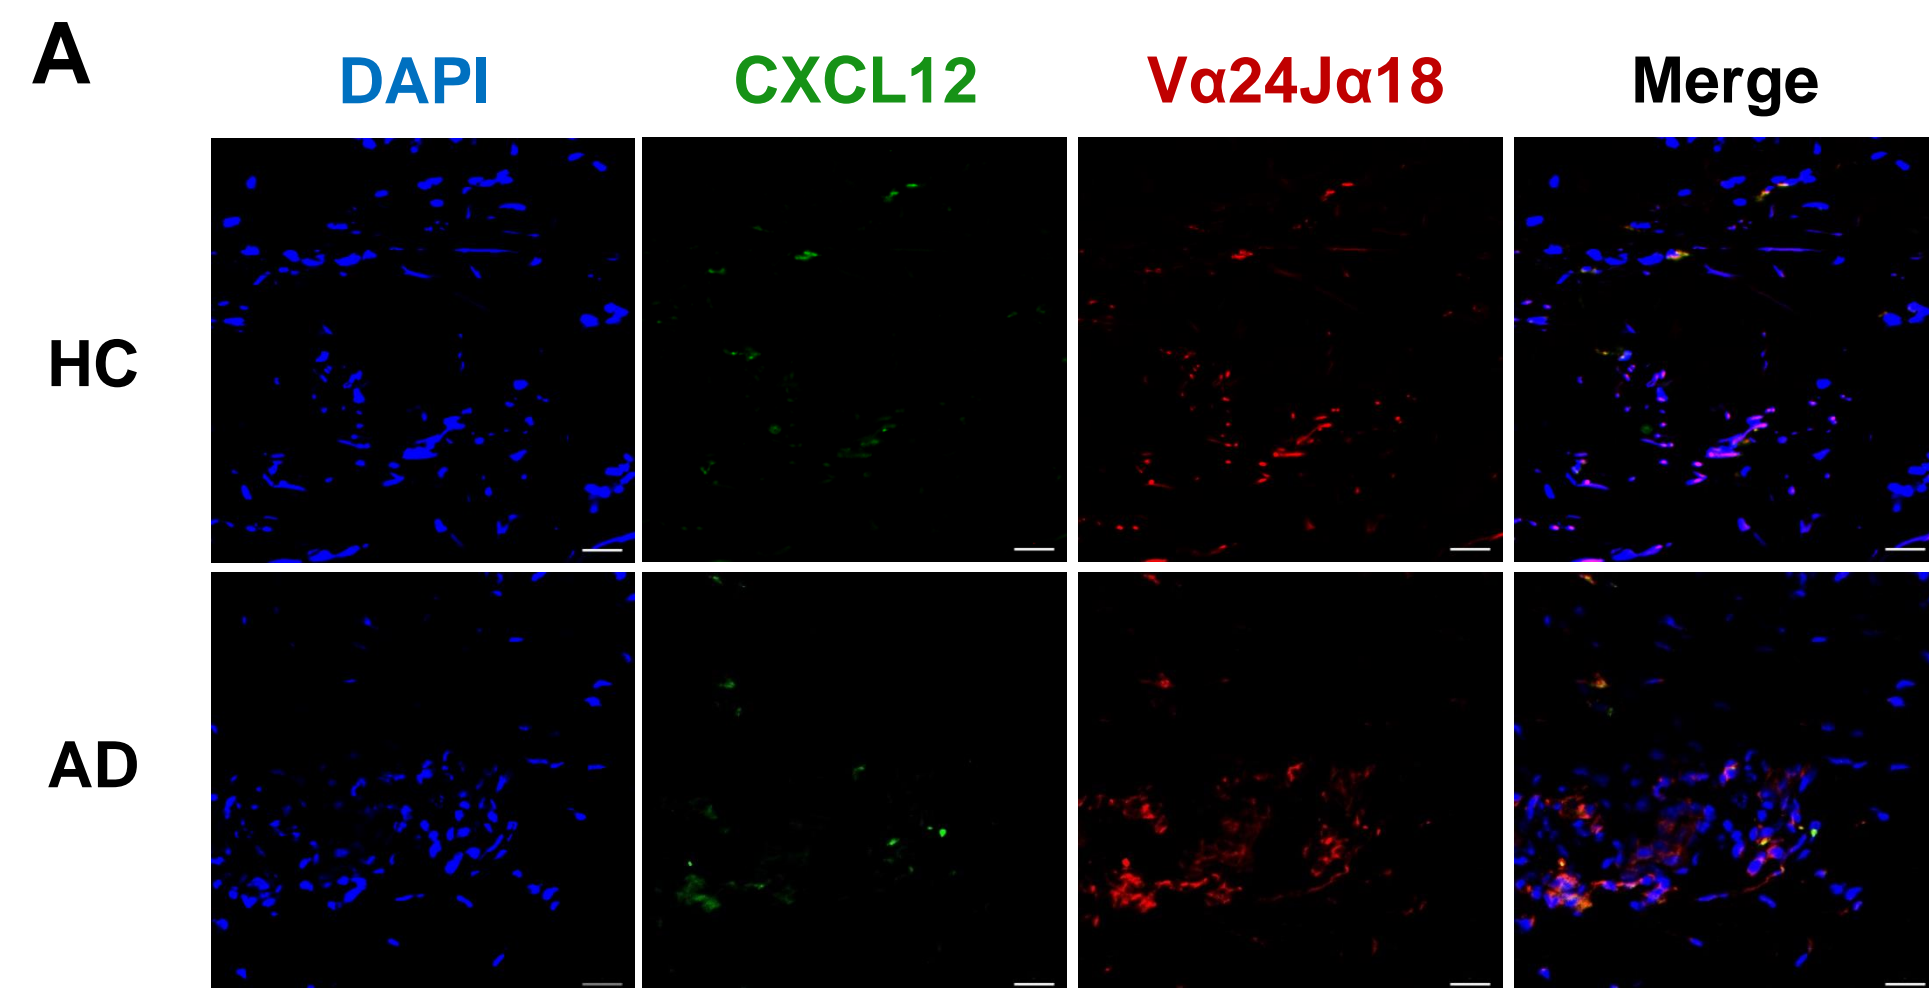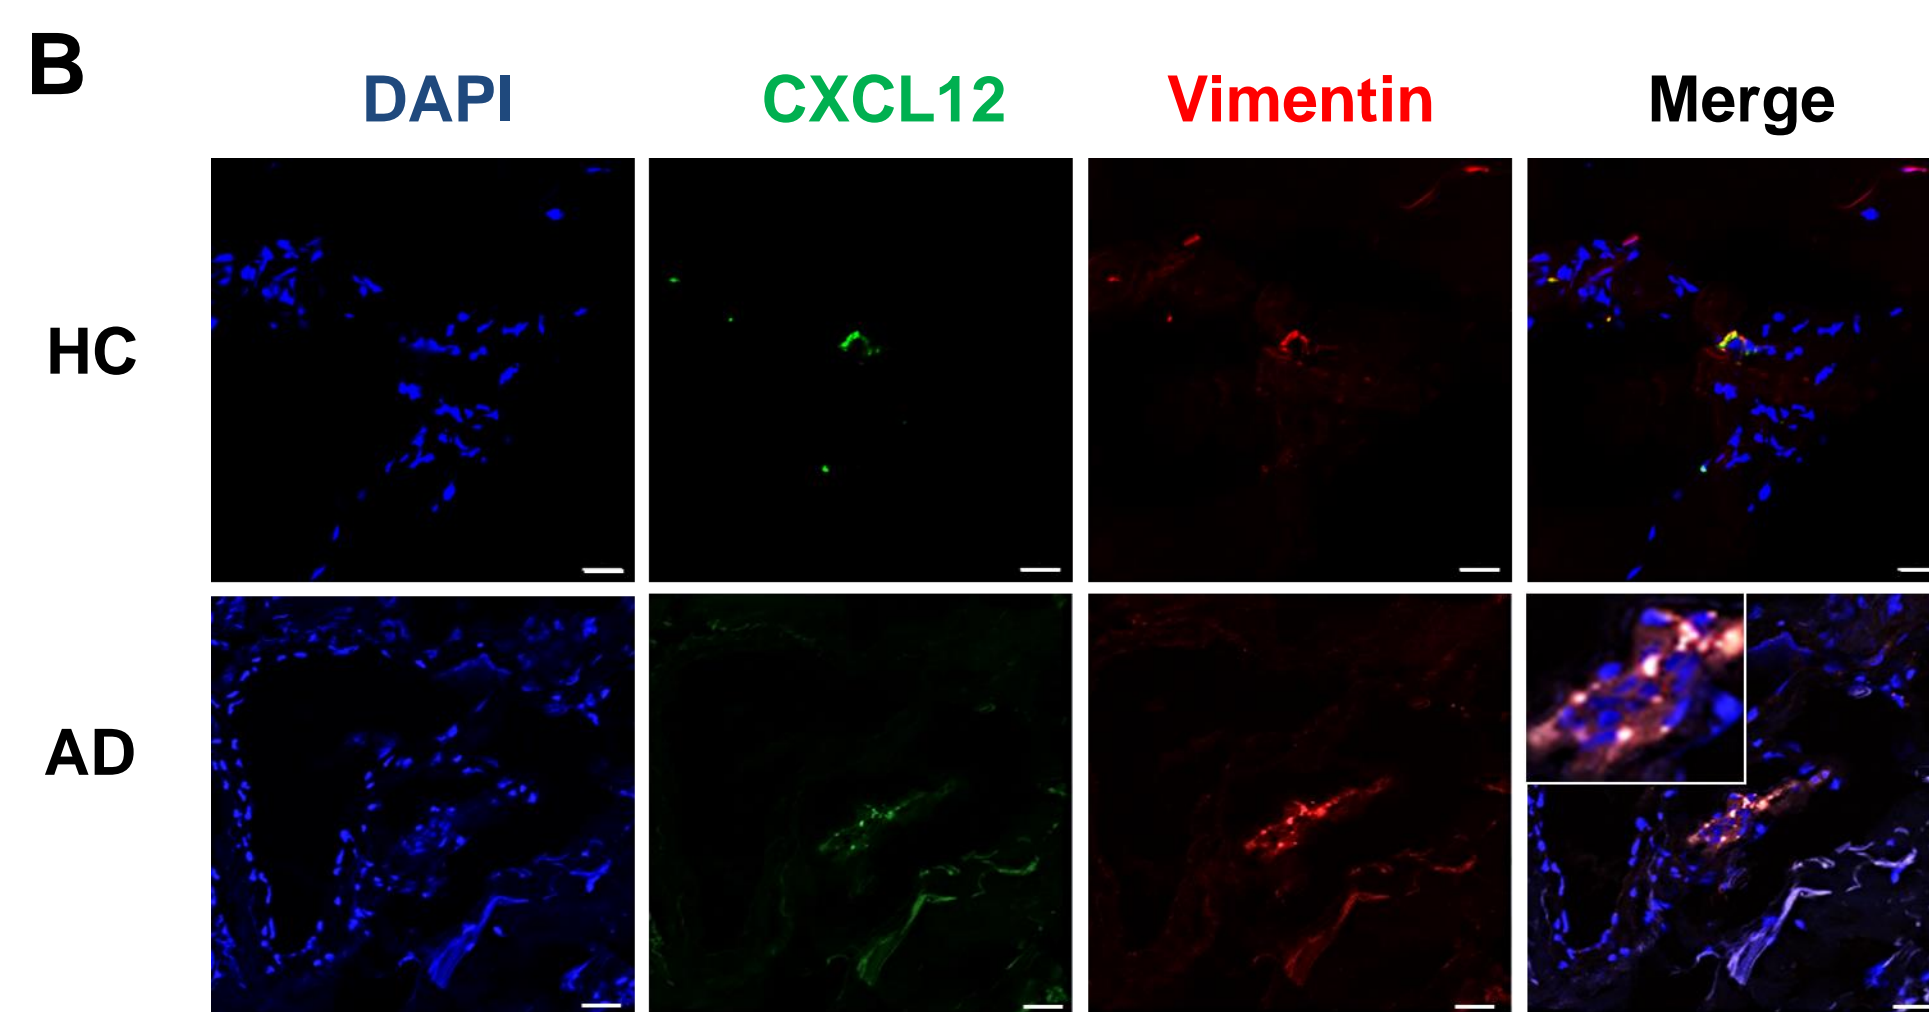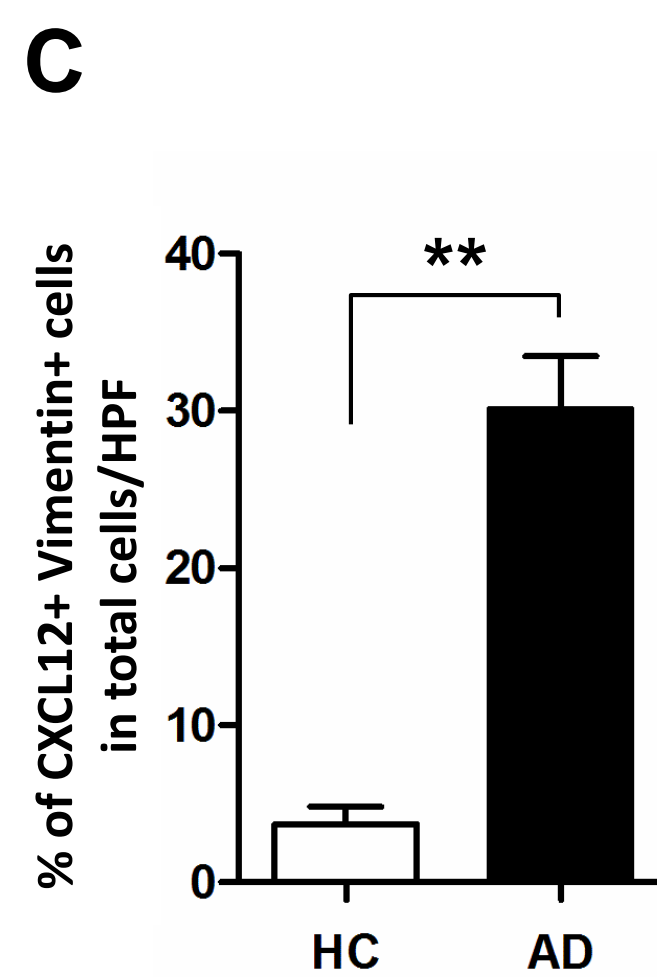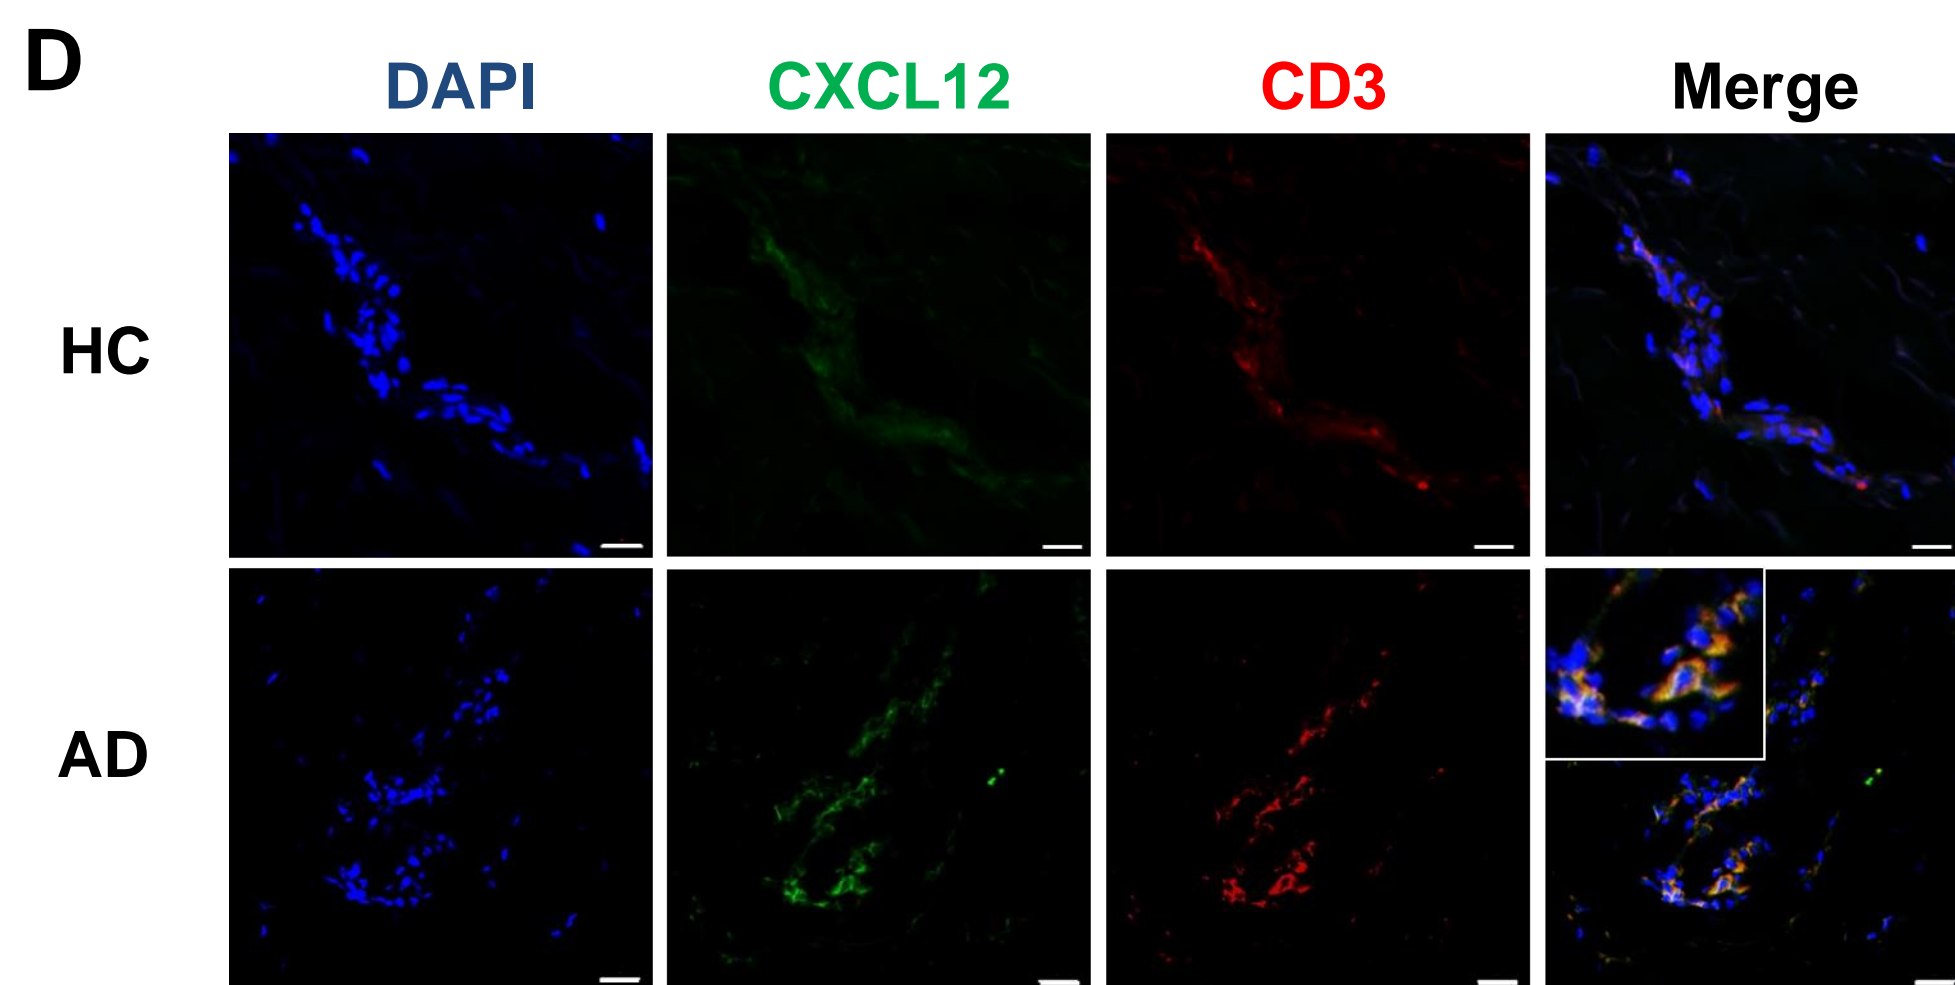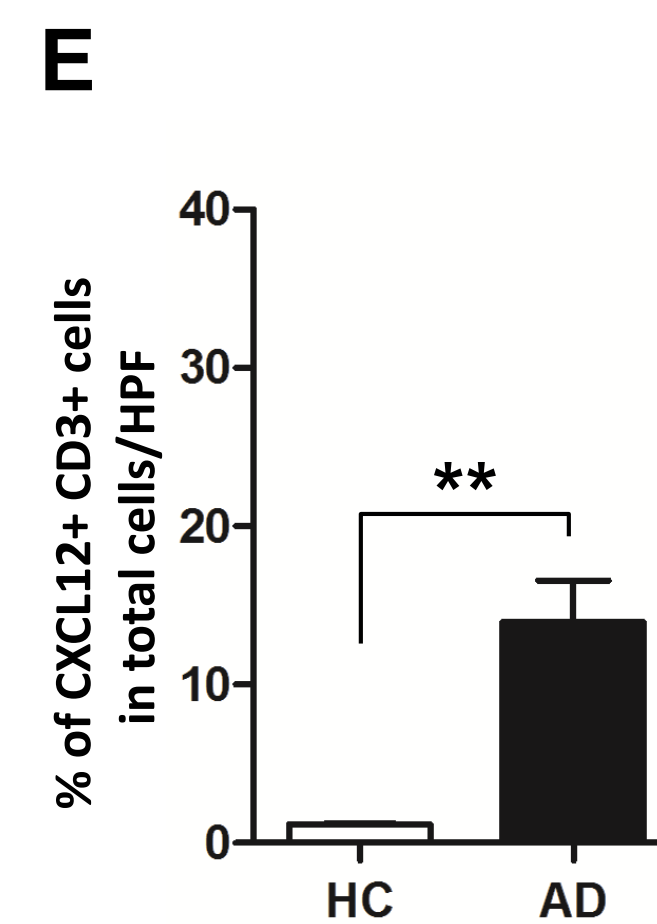

Supplement: NIHMS1678377-supplement-12.pdf [file NIHMS1678377-supplement-12.pdf]

# Supplementary Figure 3

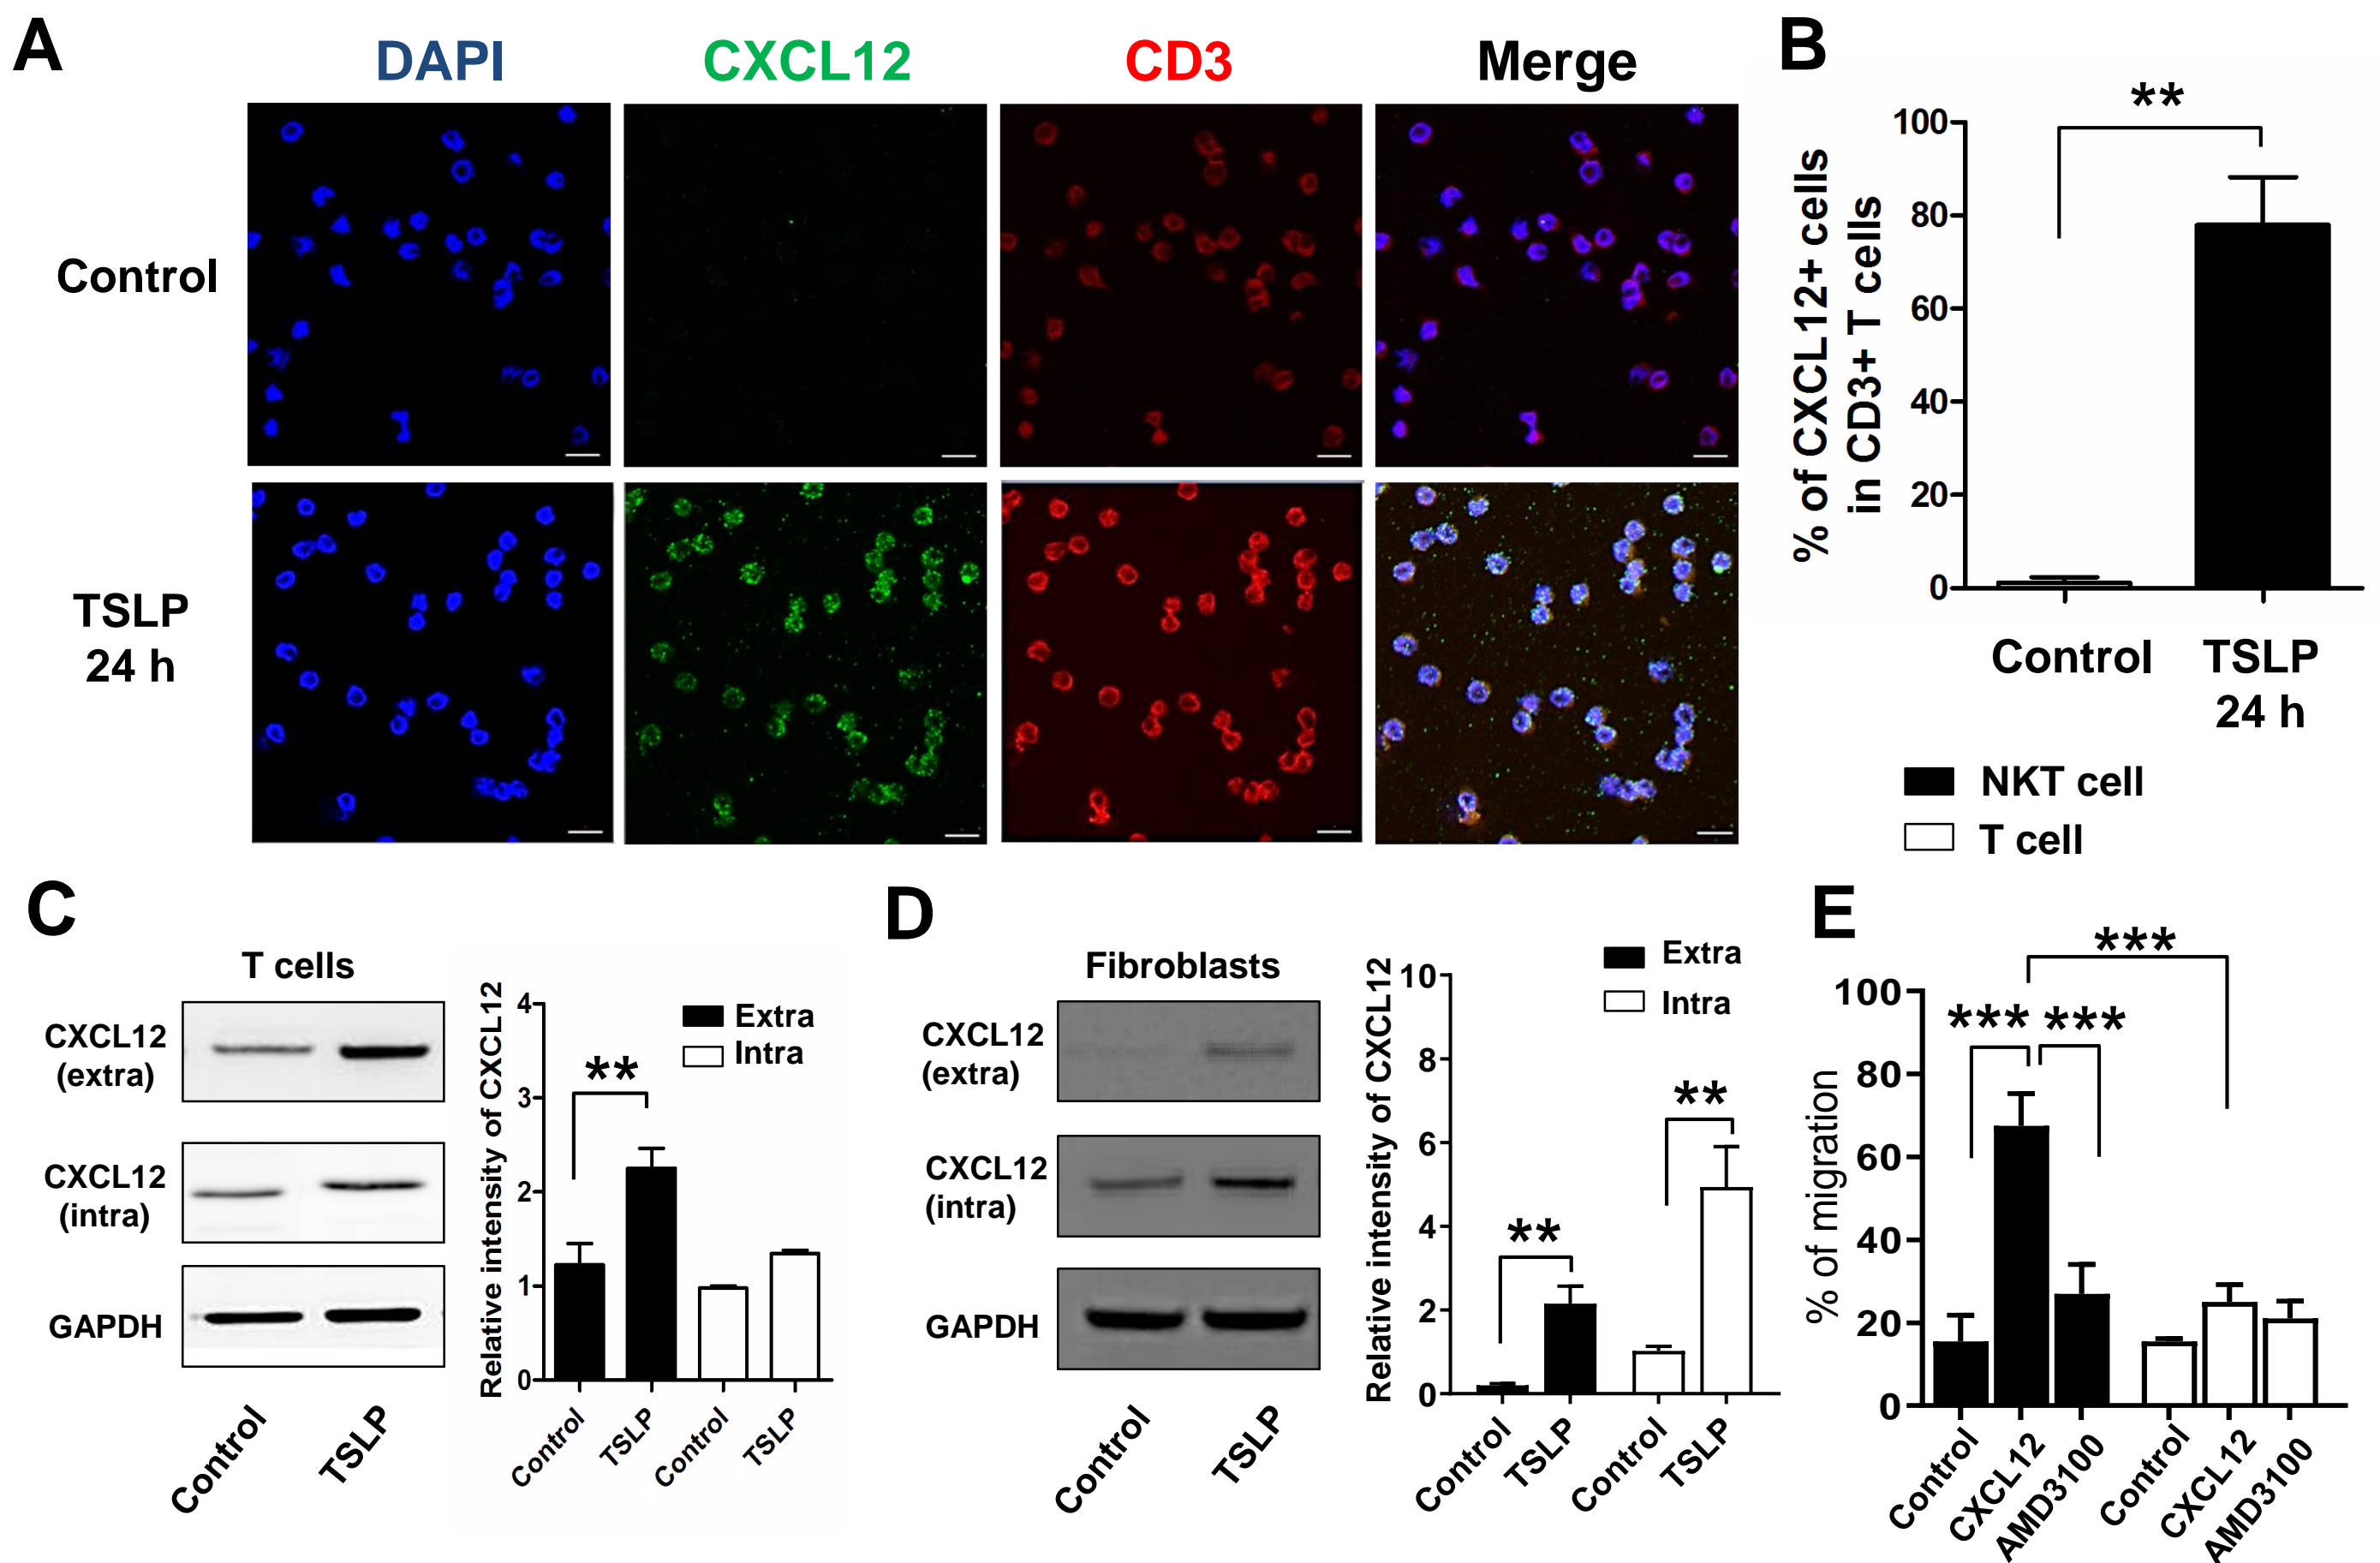

Supplement: NIHMS1678377-supplement-13.pdf [file NIHMS1678377-supplement-13.pdf]

# Supplementary Figure 5

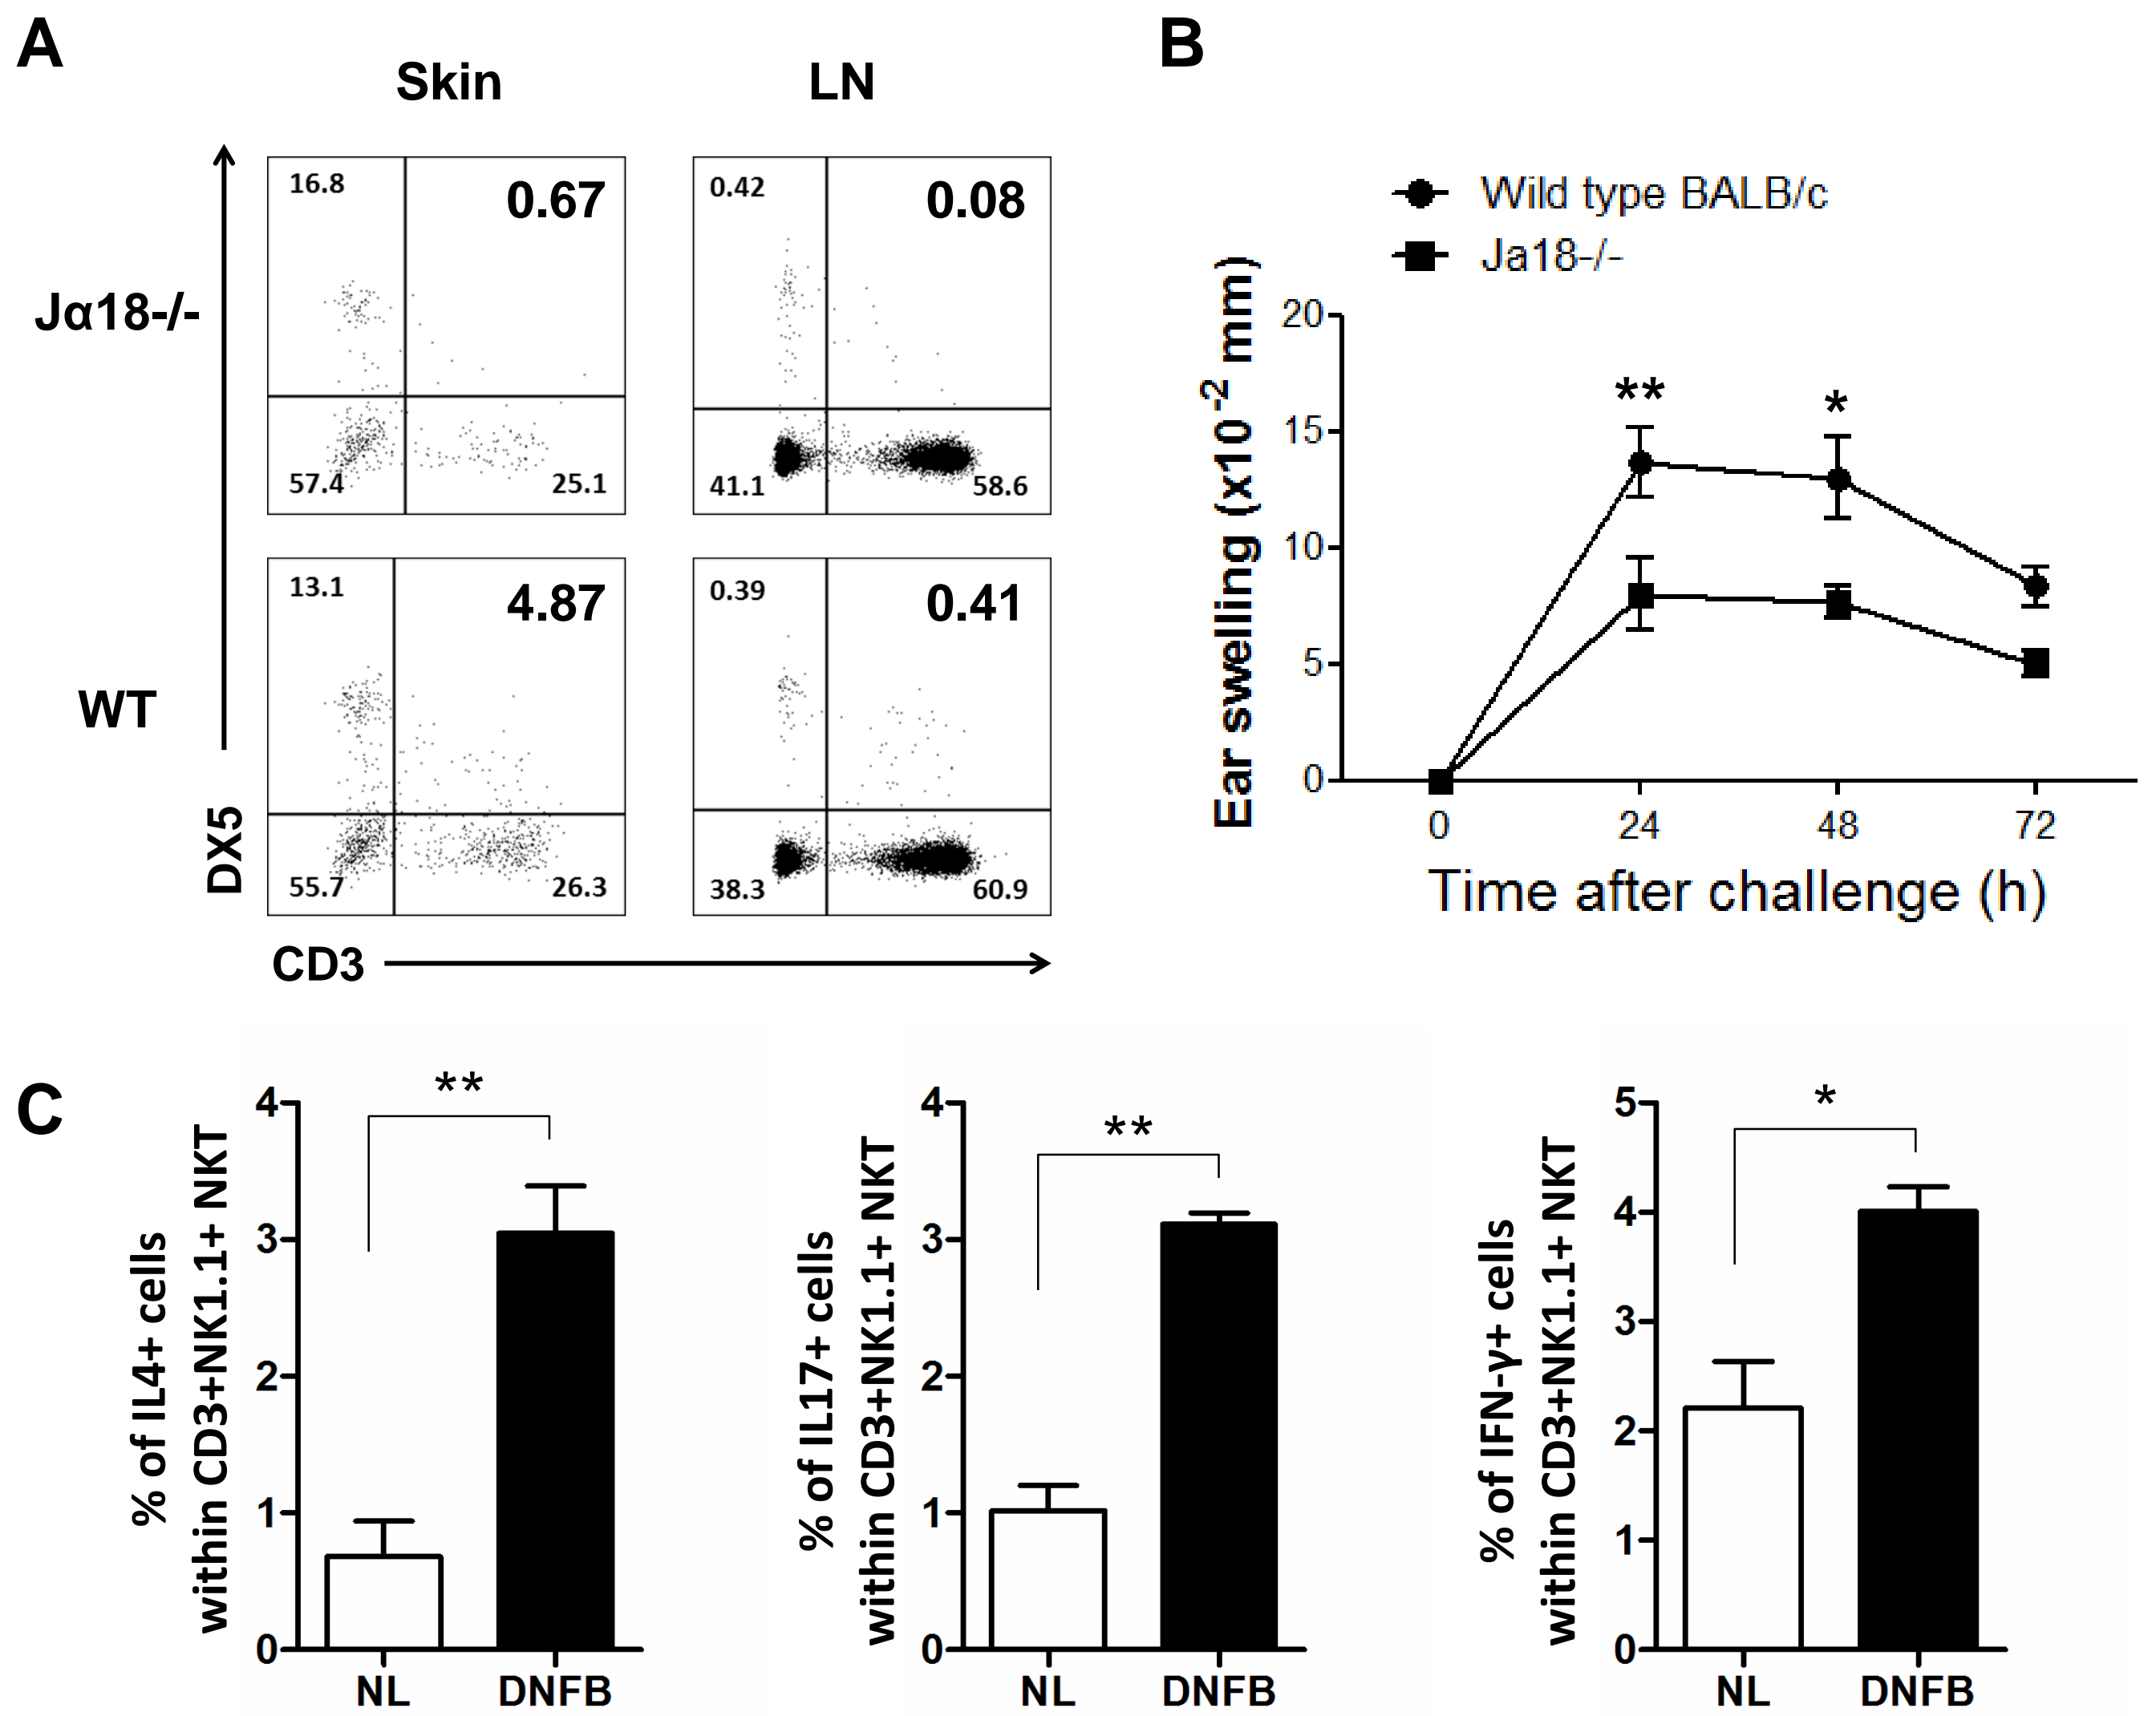

Supplement: NIHMS1678377-supplement-15.pdf [file NIHMS1678377-supplement-15.pdf]

# Supplementary Figure 7

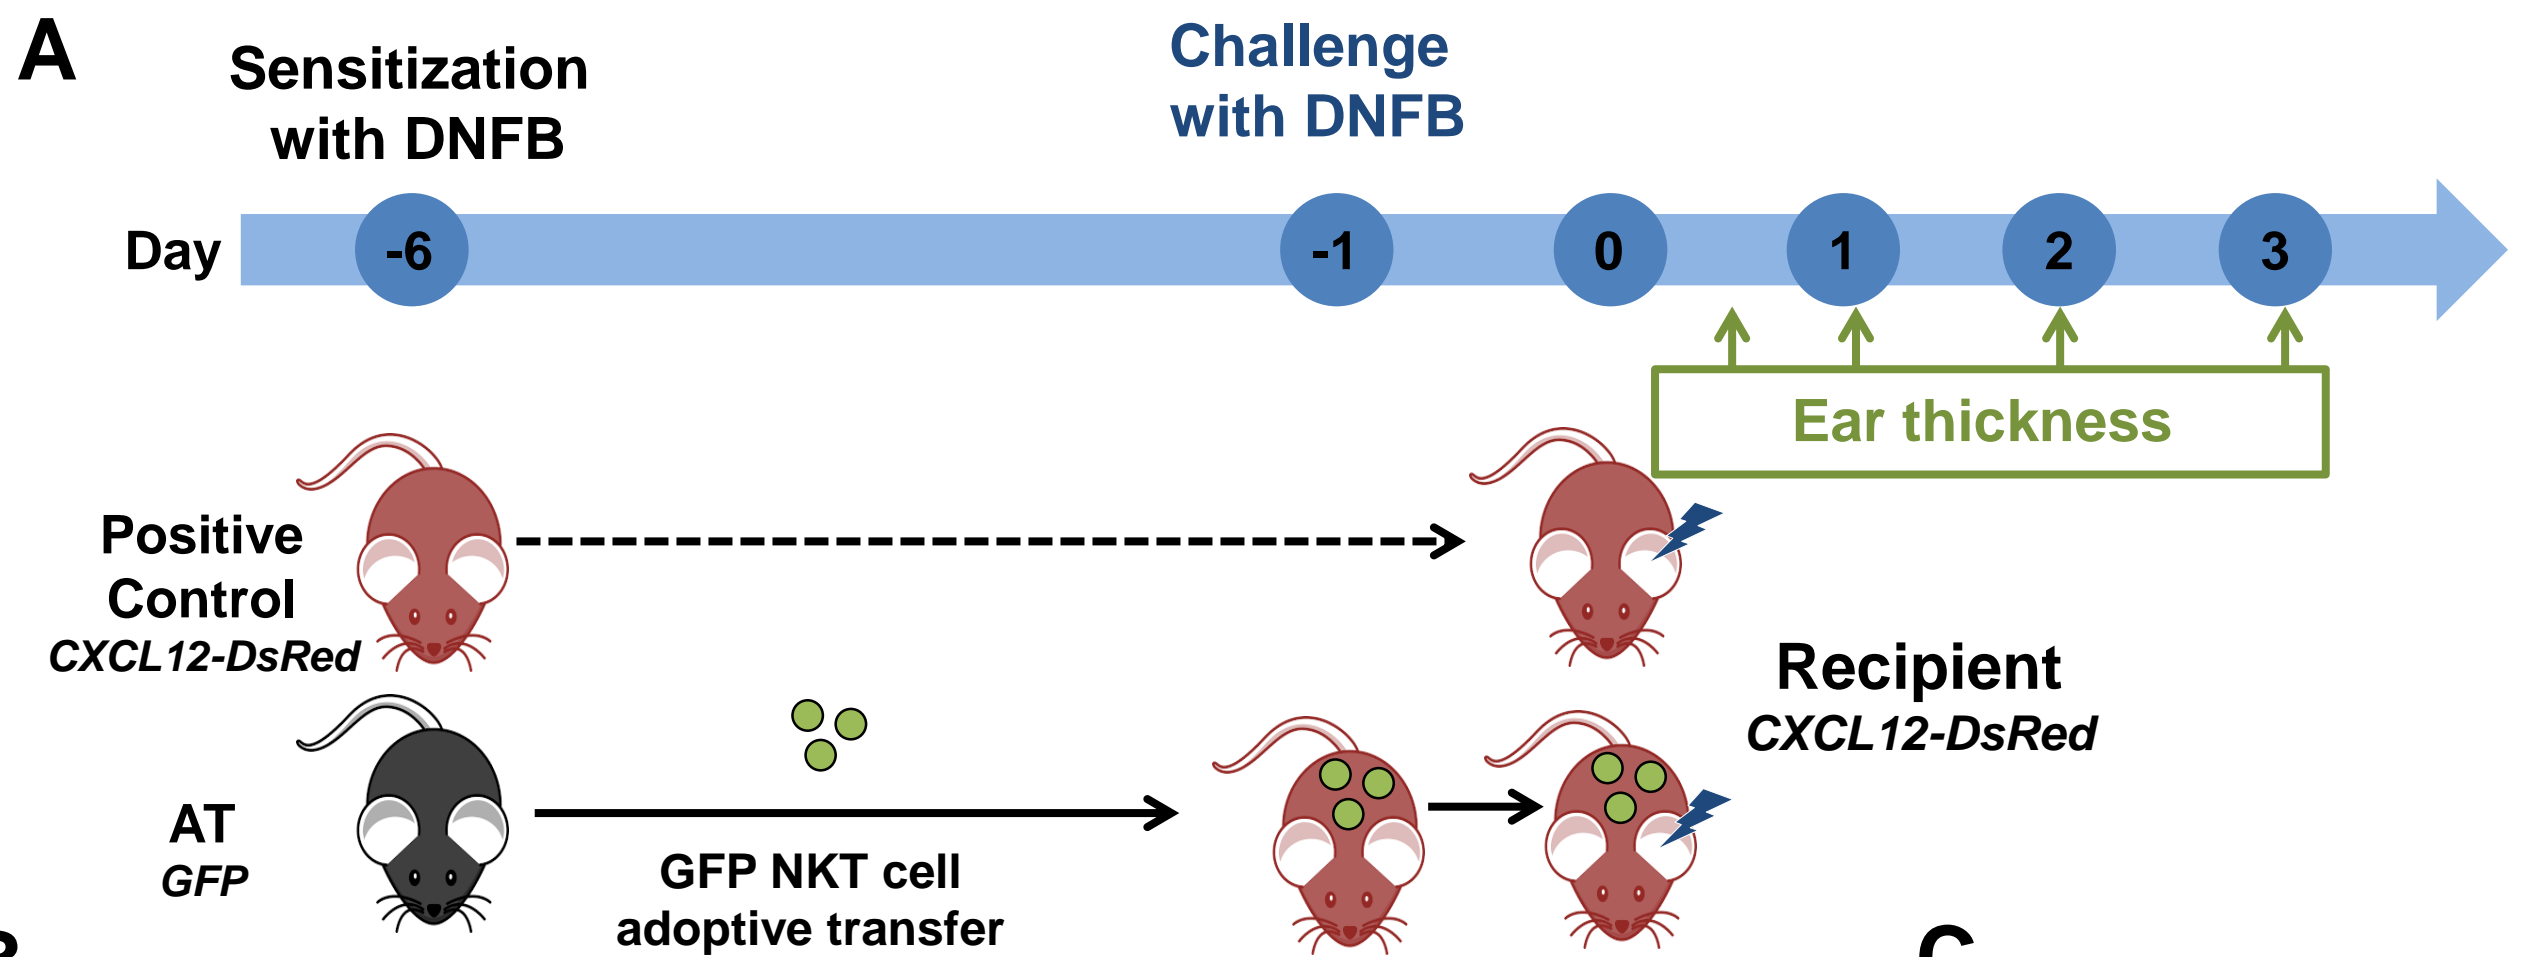

**B**

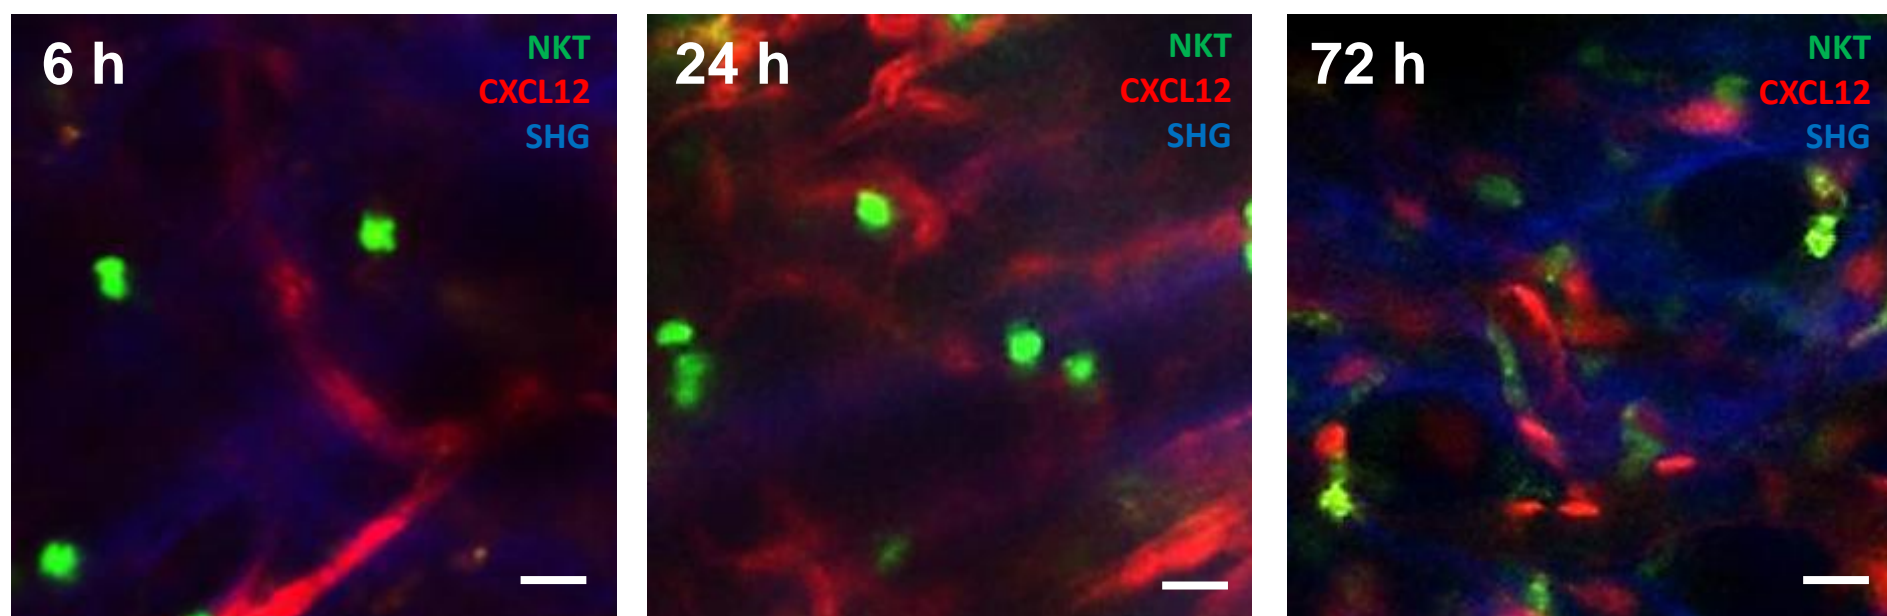

**C**

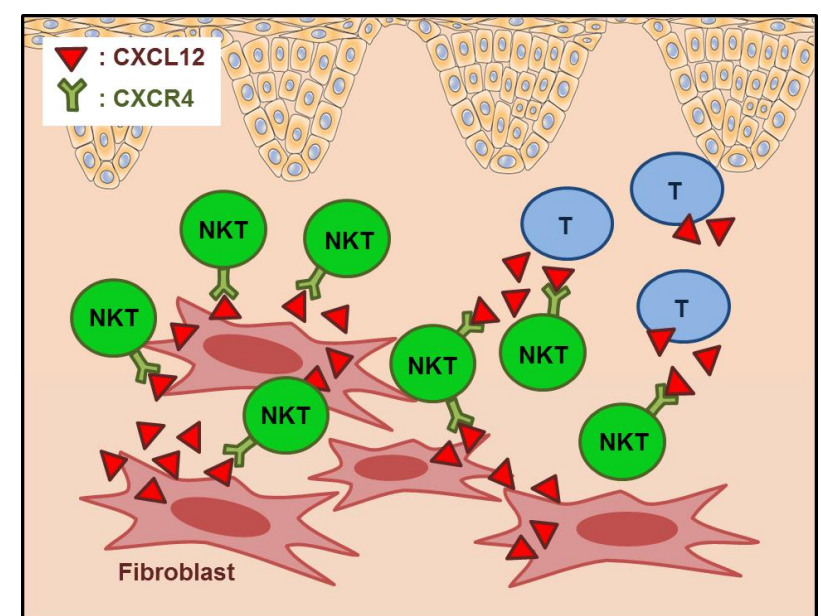

**D**

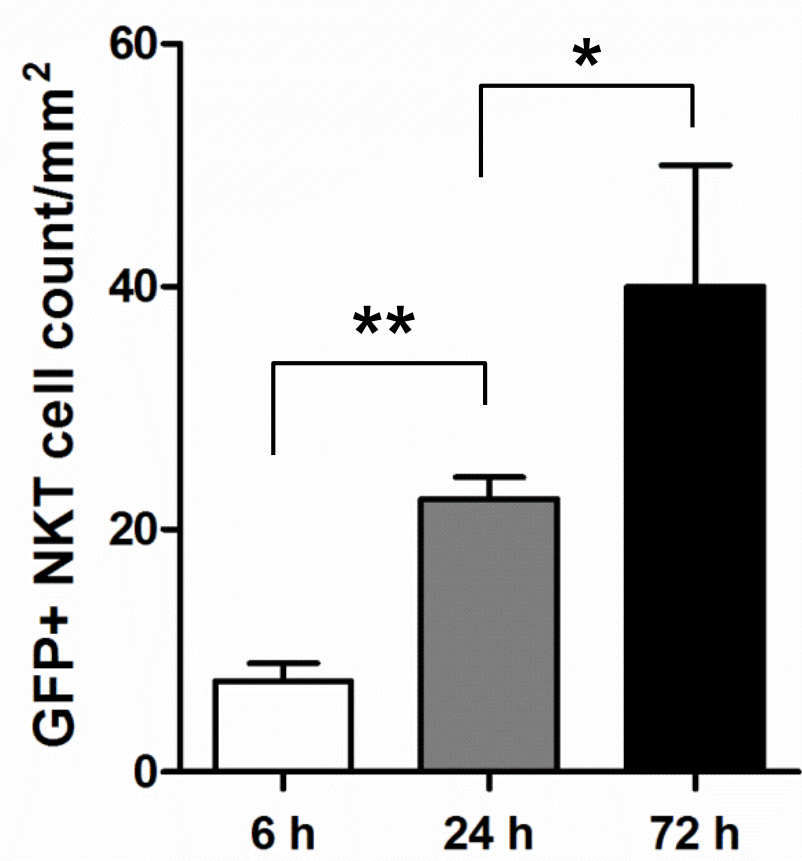

**E**

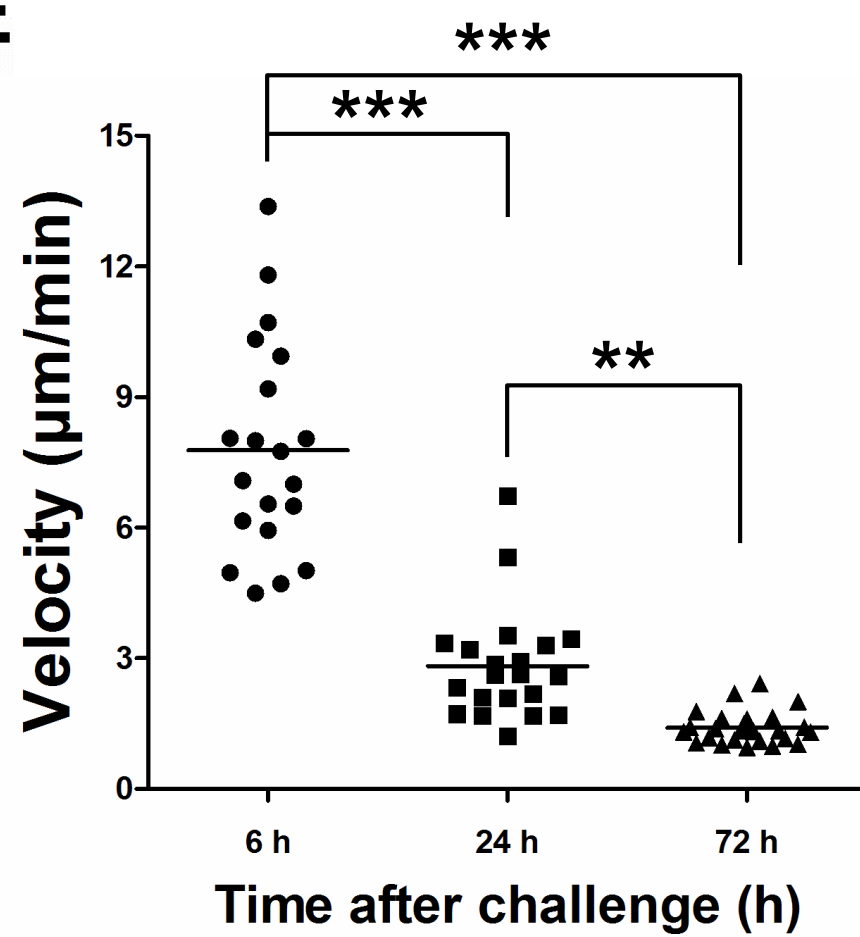

**F**

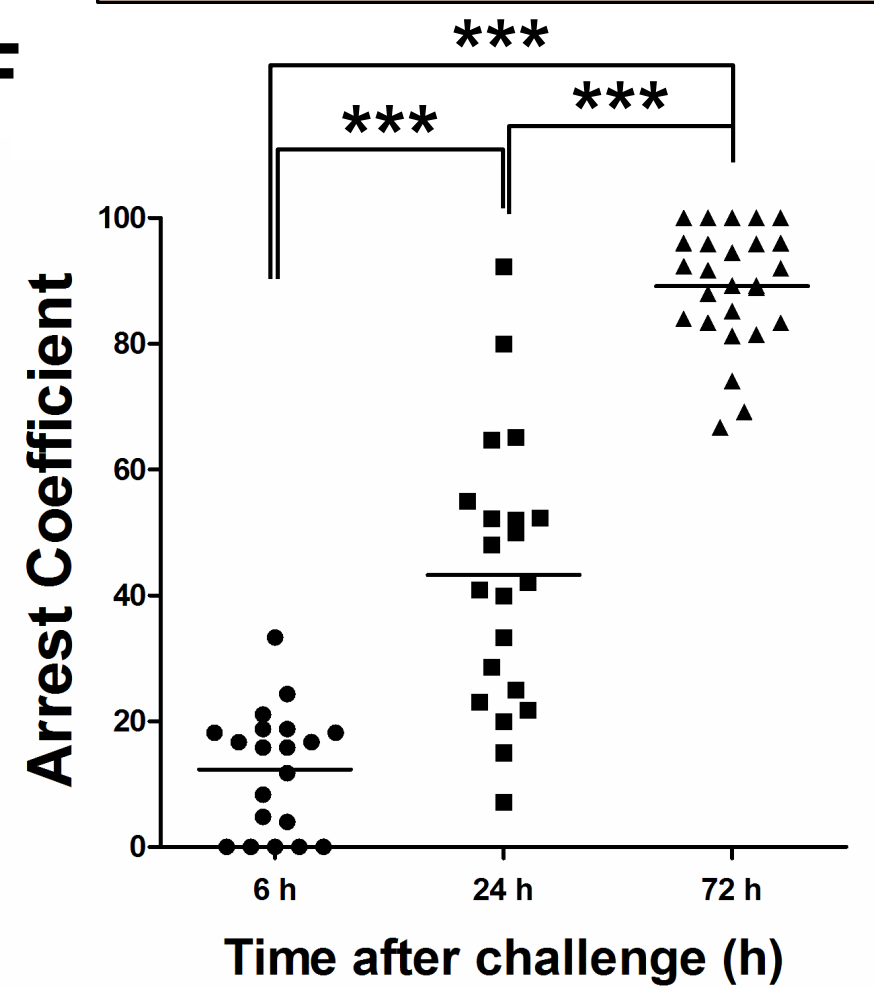

**G**

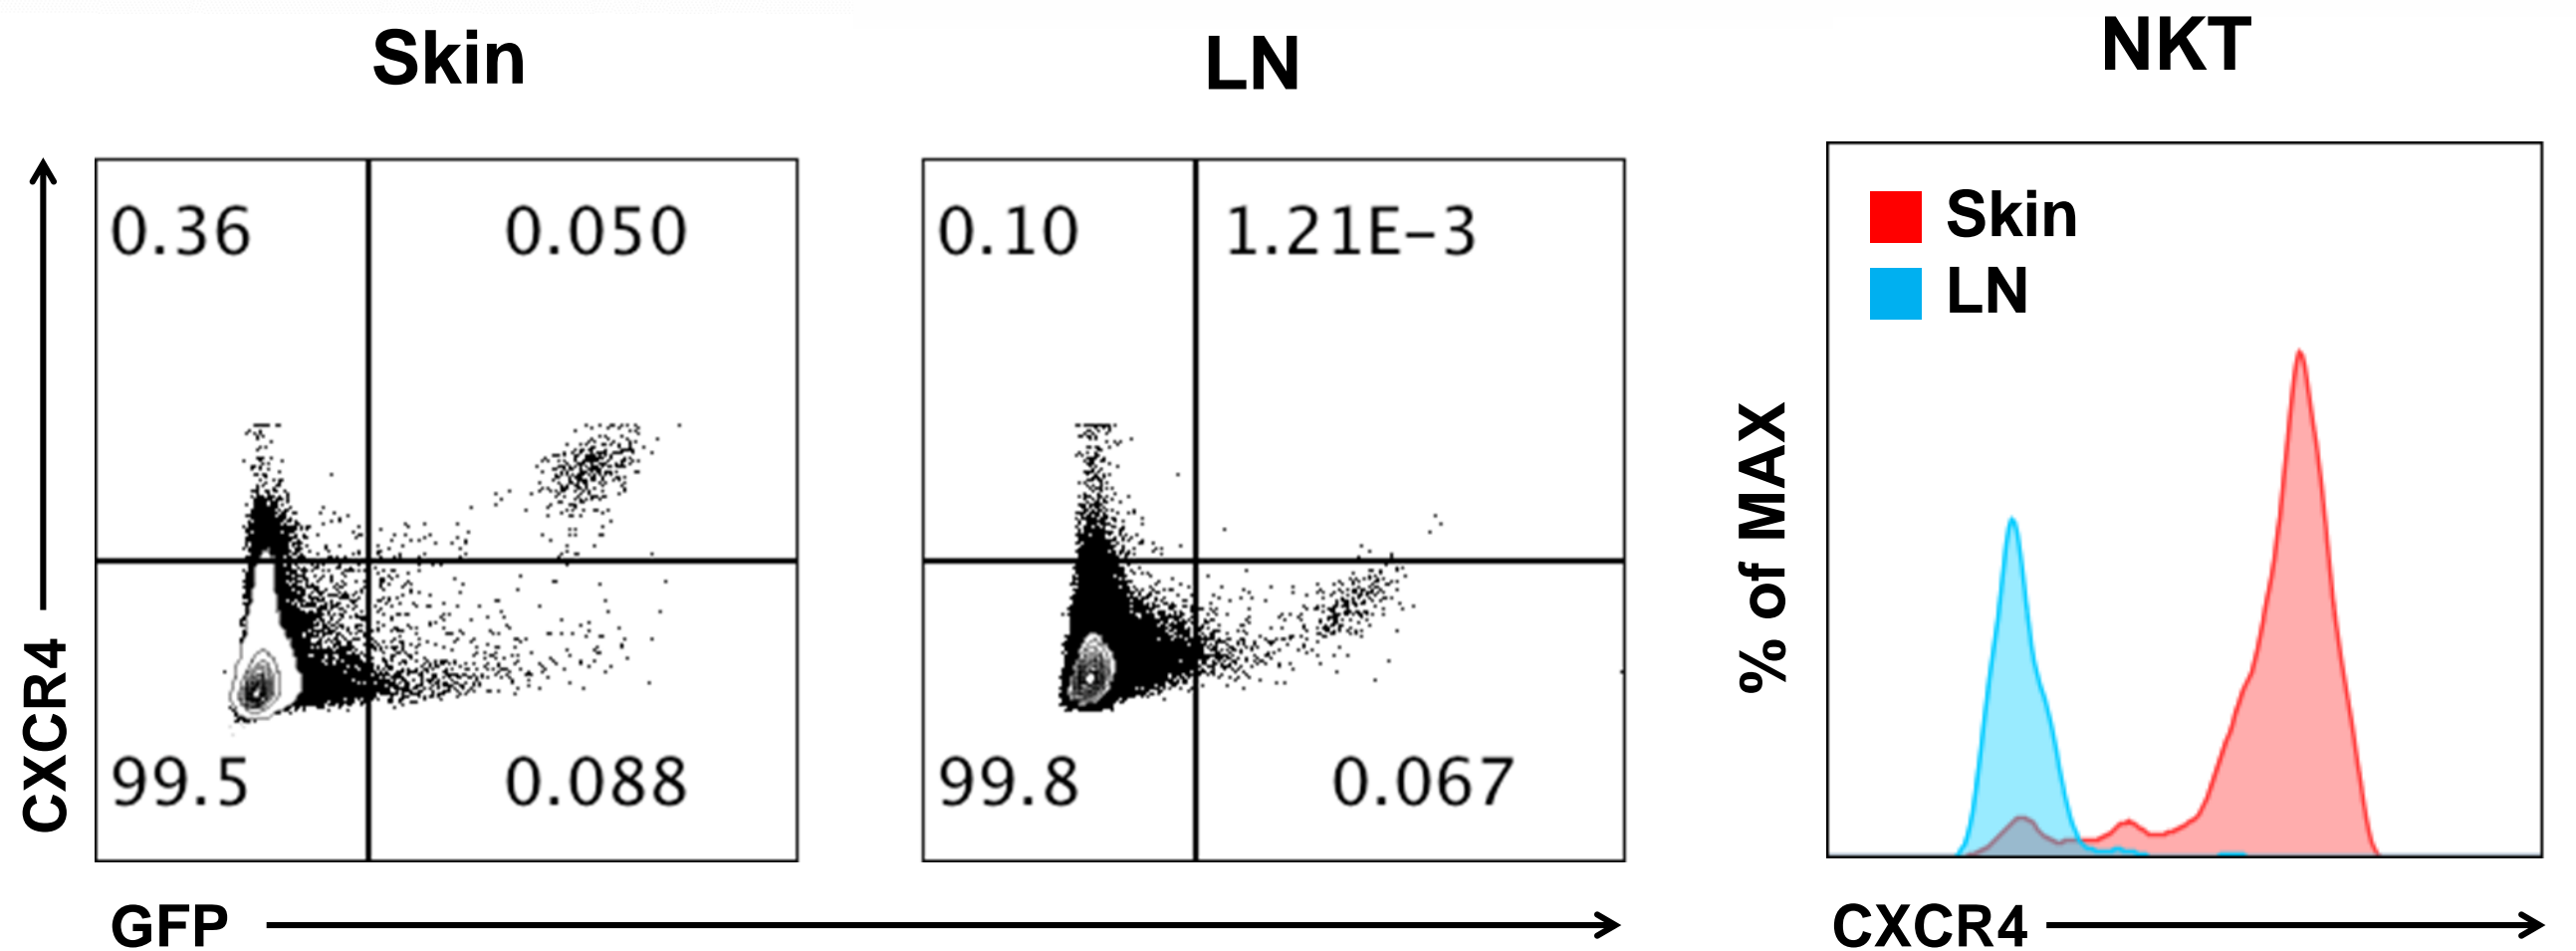

Supplement: NIHMS1678377-supplement-17.pdf [file NIHMS1678377-supplement-17.pdf]

# Supplementary Figure 9

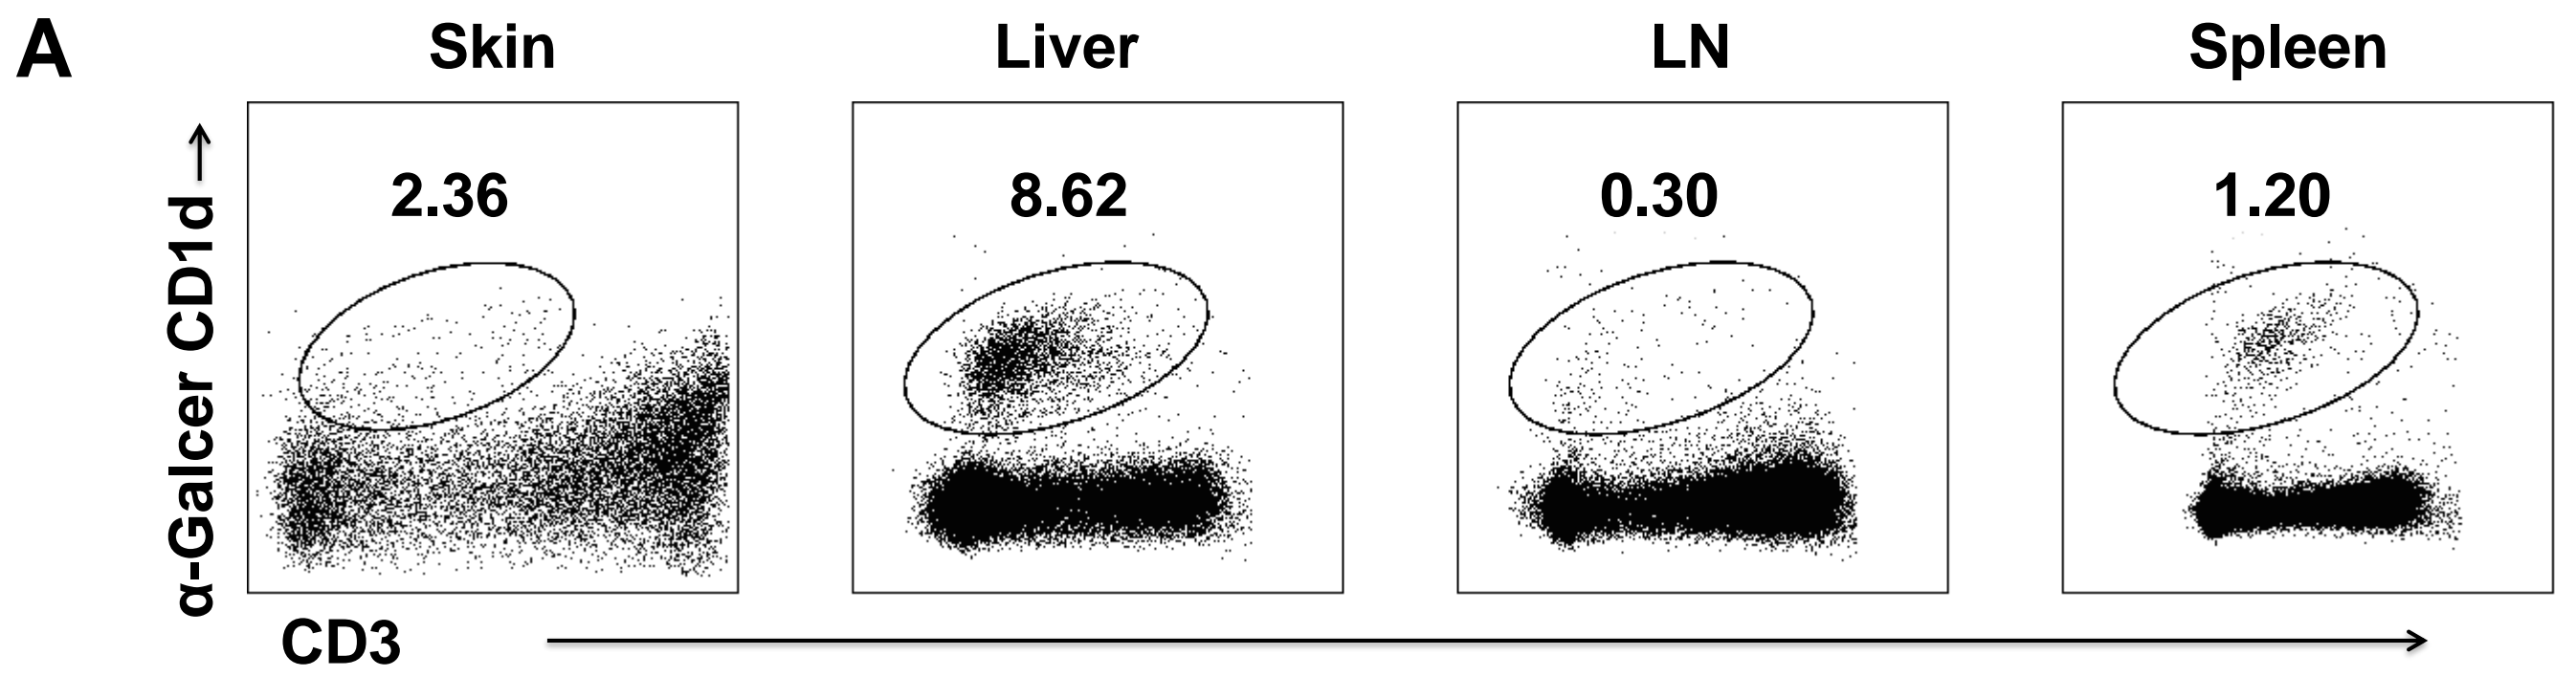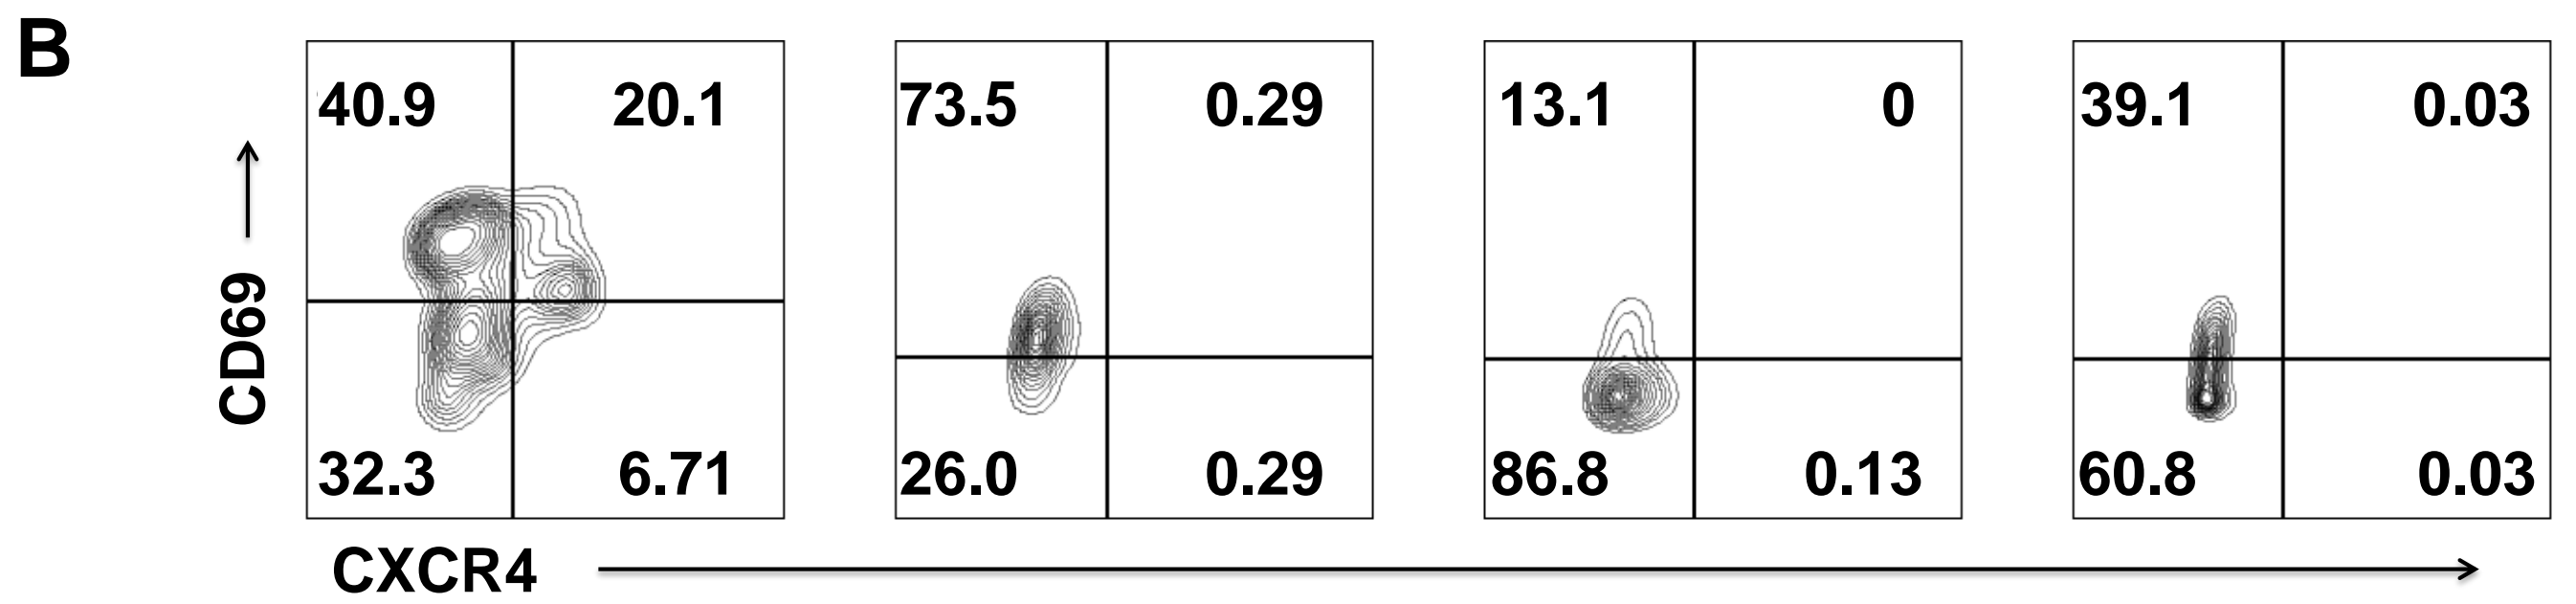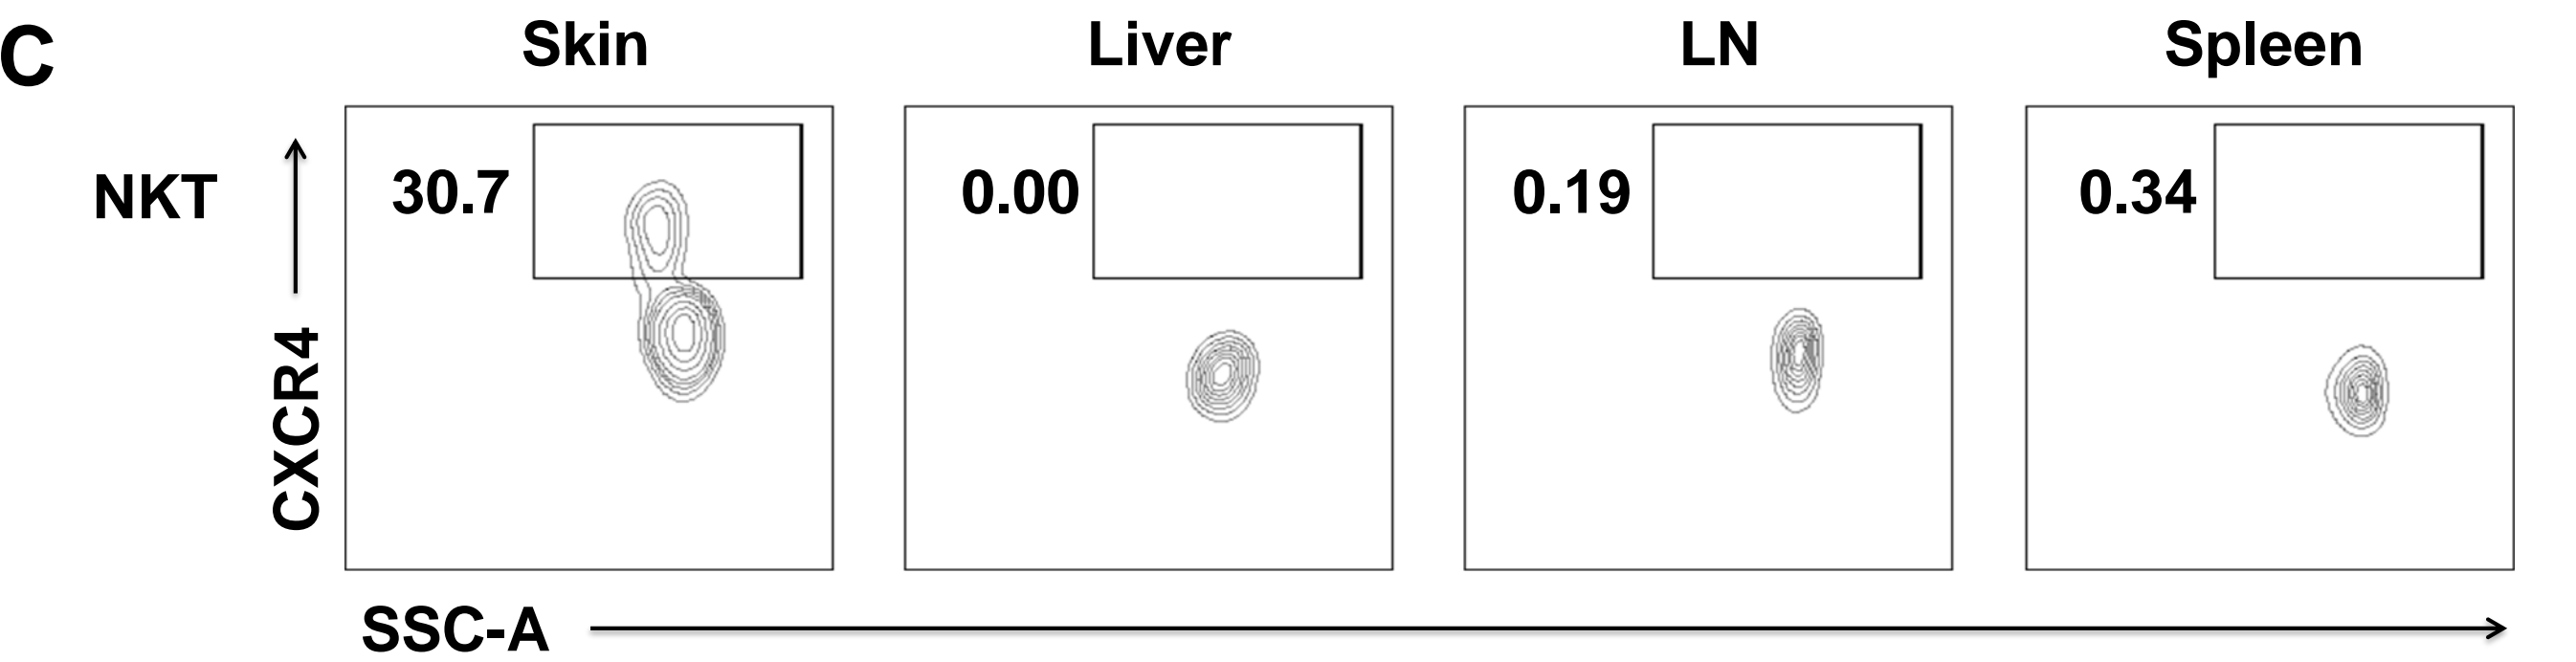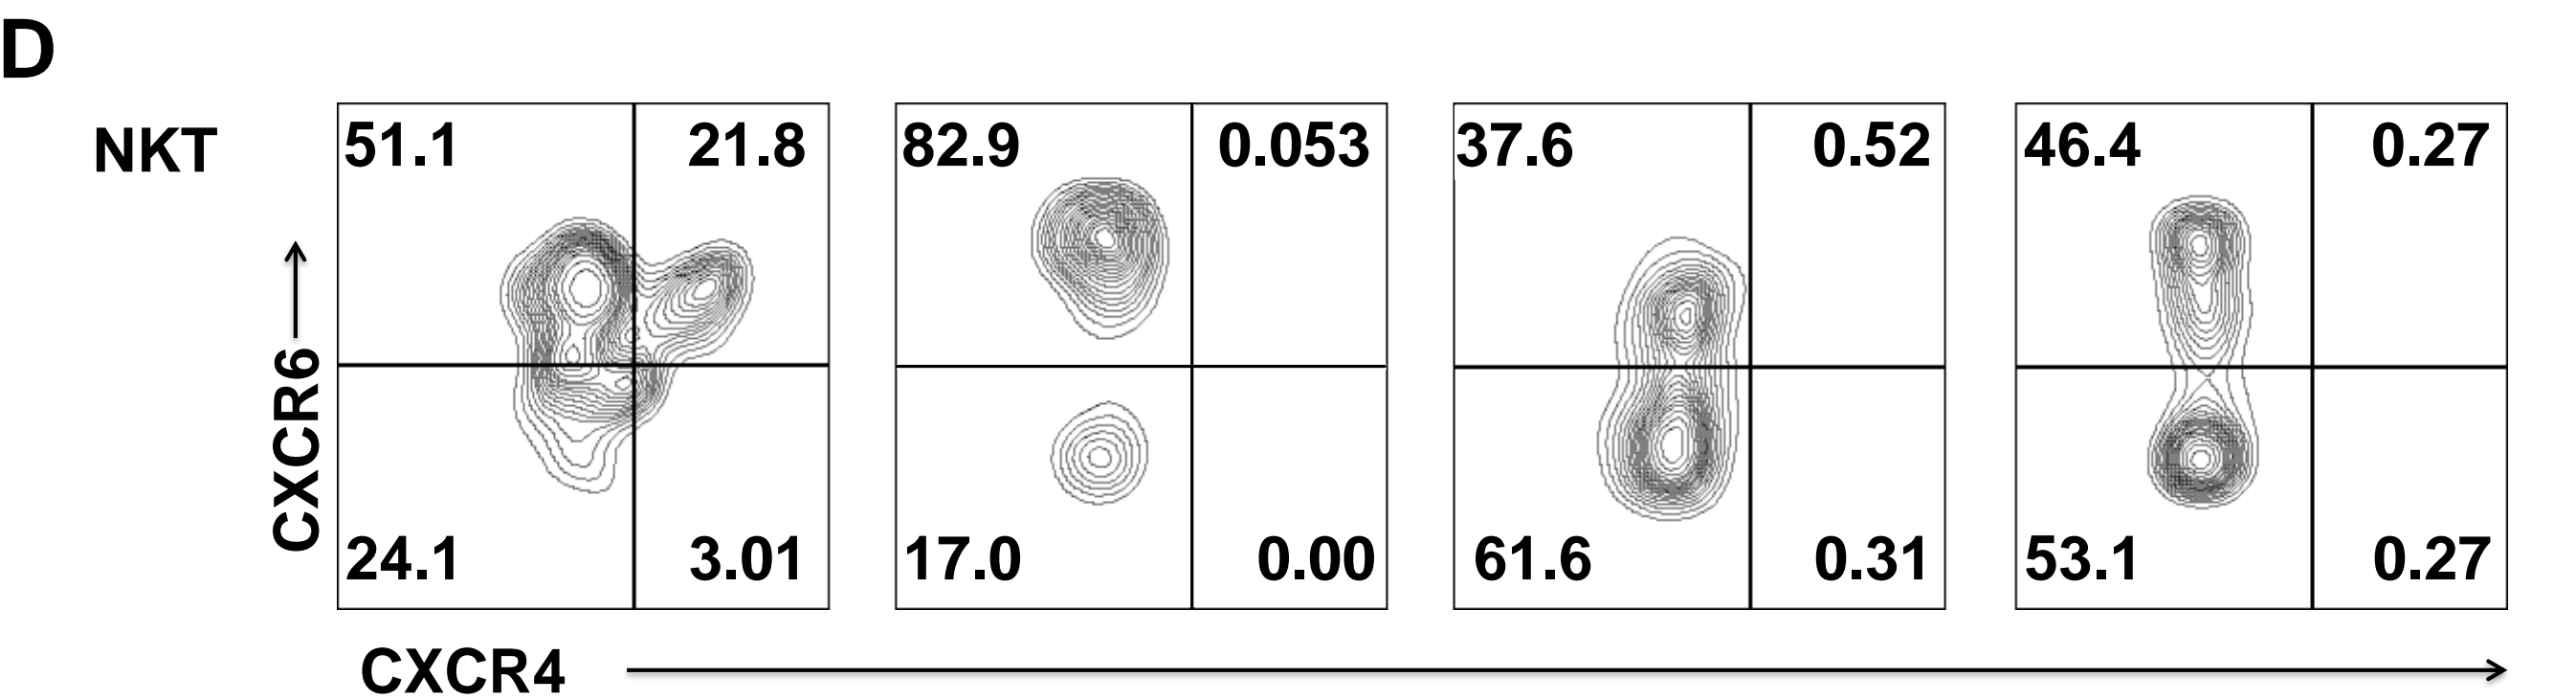

Supplement: NIHMS1678377-supplement-19.pdf [file NIHMS1678377-supplement-19.pdf]

# Supplementary Figure 10

## A

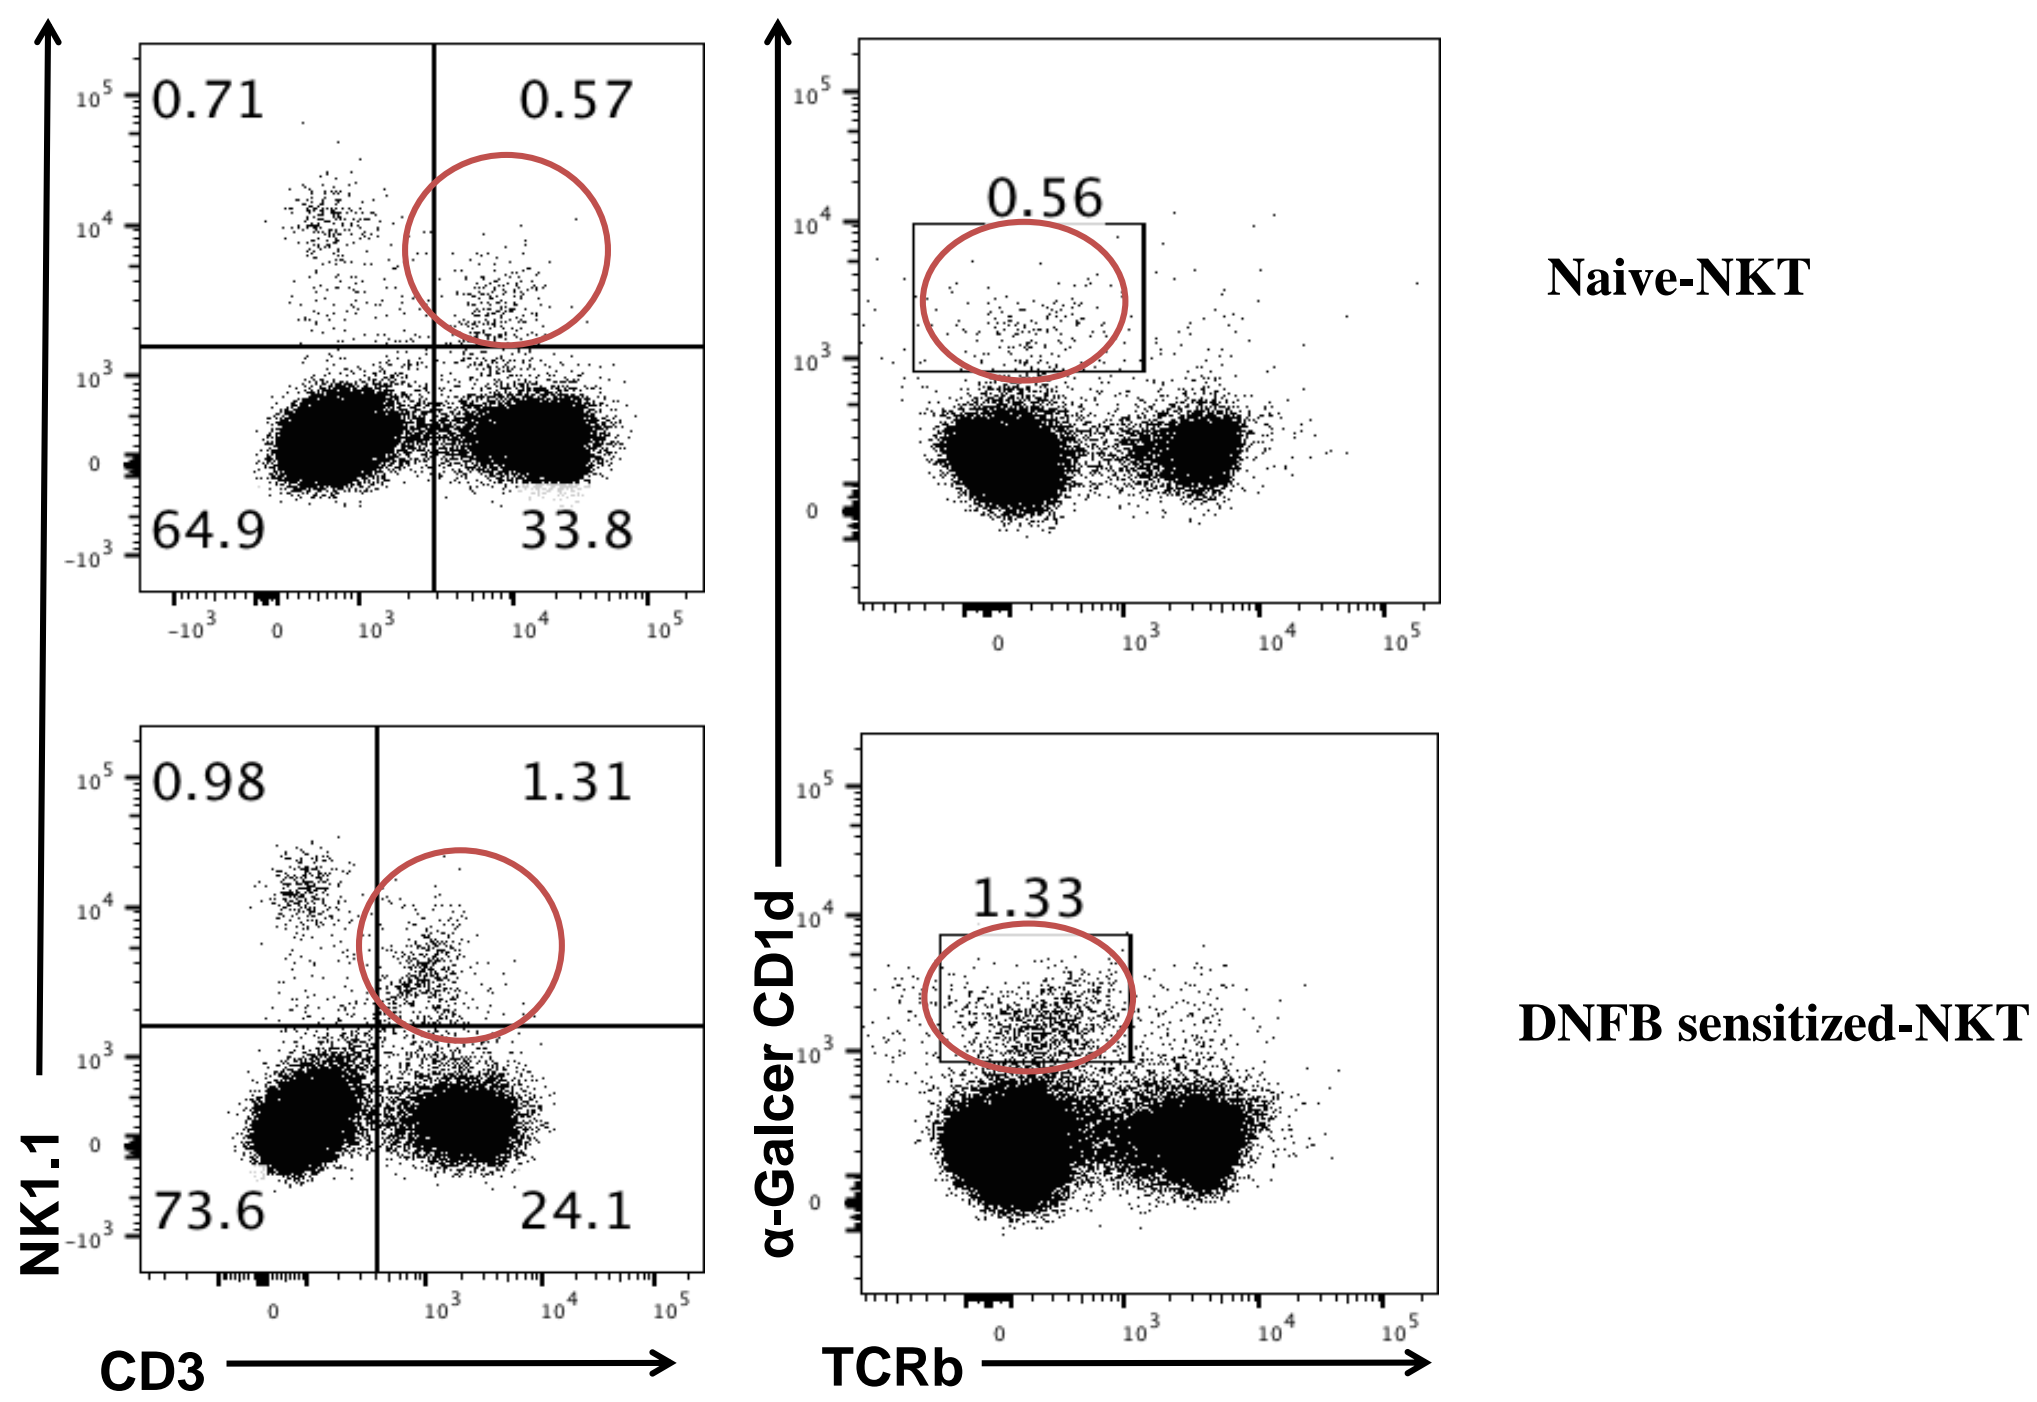

## B

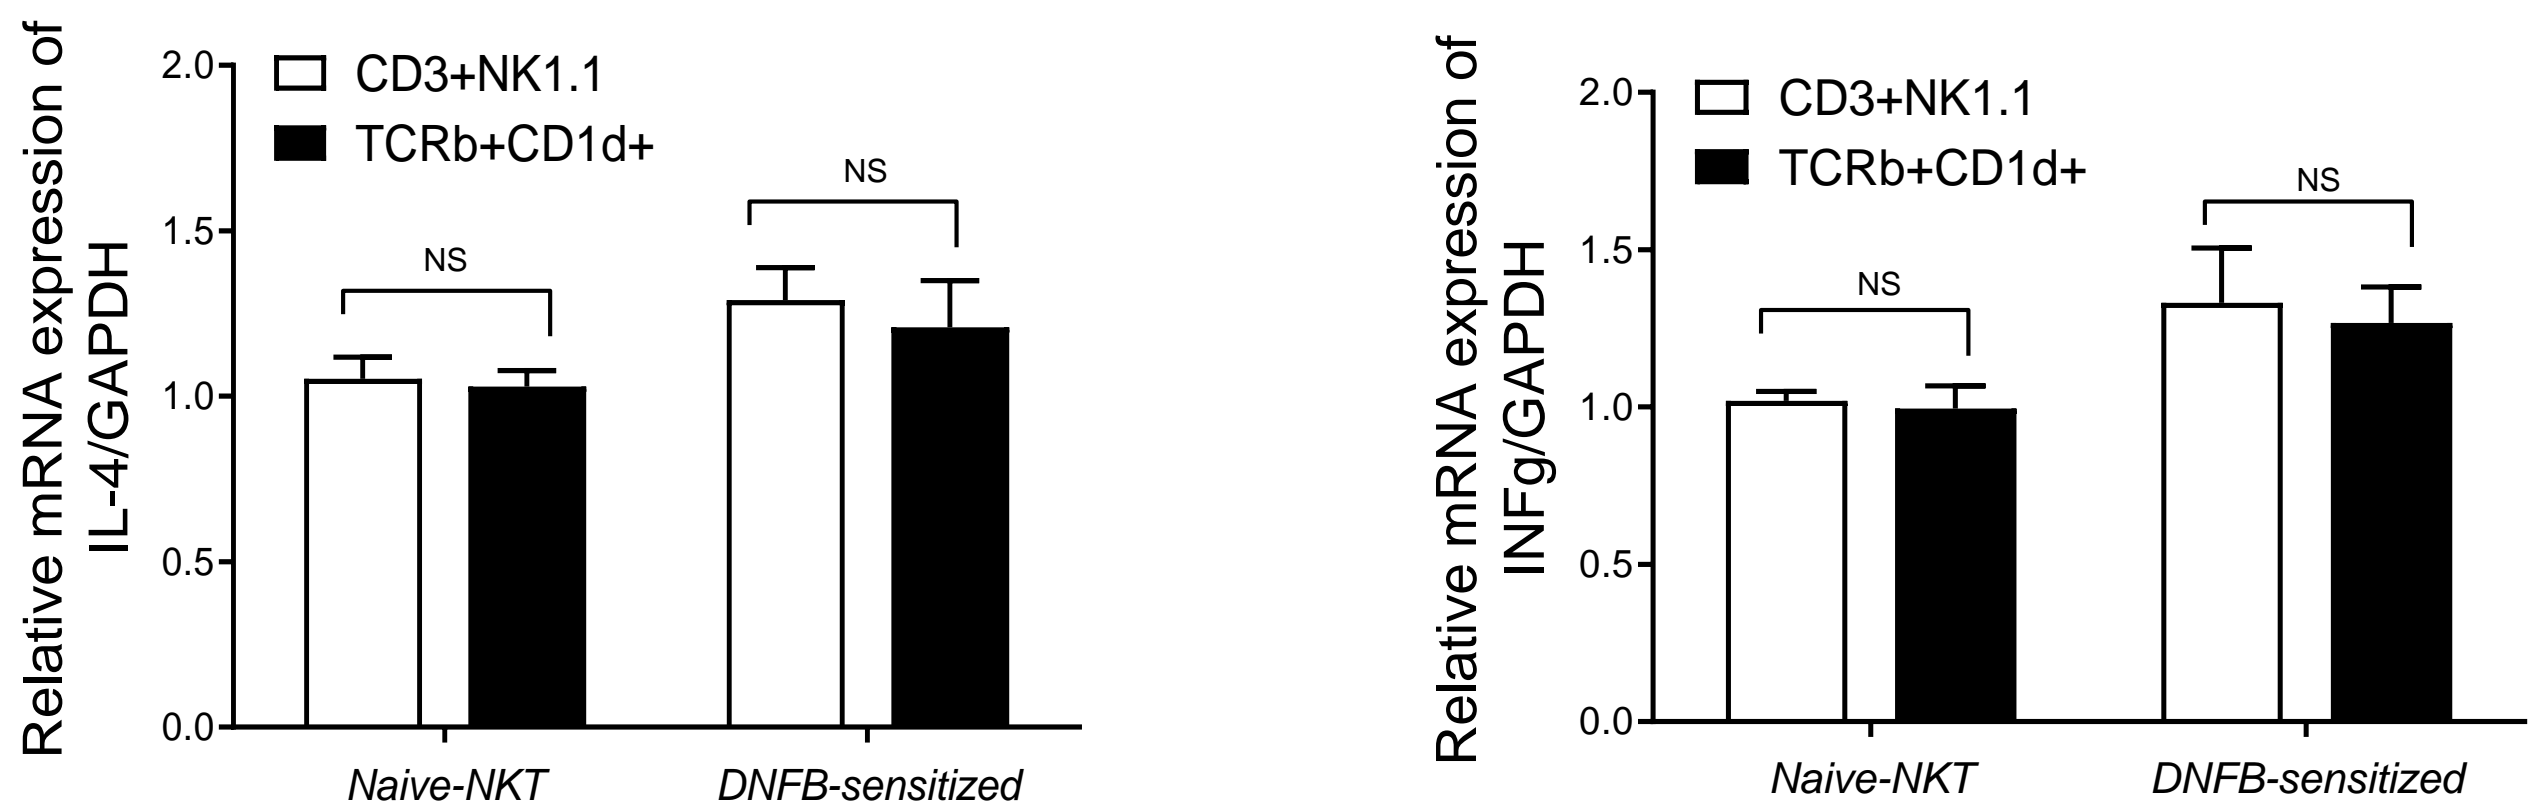

Supplement: NIHMS1678377-supplement-20.pdf [file NIHMS1678377-supplement-20.pdf]
